# Supplementary material for: Adapting the Diabetes Prevention Program for low and middle-income countries: protocol for a cluster randomised trial to evaluate ‘Lifestyle Africa’
Source: PubMed Central journal article supplement — BMJ Open. 2019 Nov 11;9(11):e031400. doi: 10.1136/bmjopen-2019-031400 (PMC6858109; doi:10.1136/bmjopen-2019-031400), 2019-11-11
Supplement: bmjopen-2019-031400.draft_revisions.pdf [file bmjopen-2019-031400.draft_revisions.pdf]

# BMJ Open

BMJ Open is committed to open peer review. As part of this commitment we make the peer review history of every article we publish publicly available.

When an article is published we post the peer reviewers' comments and the authors' responses online. We also post the versions of the paper that were used during peer review. These are the versions that the peer review comments apply to.

The versions of the paper that follow are the versions that were submitted during the peer review process. They are not the versions of record or the final published versions. They should not be cited or distributed as the published version of this manuscript.

BMJ Open is an open access journal and the full, final, typeset and author-corrected version of record of the manuscript is available on our site with no access controls, subscription charges or pay-per-view fees (<http://bmjopen.bmj.com>).

If you have any questions on BMJ Open's open peer review process please email [info.bmjopen@bmj.com](mailto:info.bmjopen@bmj.com)

# BMJ Open

## Adapting the Diabetes Prevention Program for low and middle-income countries: Protocol for a cluster randomized trial to evaluate "Lifestyle Africa"

|                               |                                                                                                                                                                                                                                                                                                                                                                                                                                                                                                                                                                                                                                                                                                                                                                                                                                                                                                                                                                                                                                                                                                                                                                                                                                                                                        |
|-------------------------------|----------------------------------------------------------------------------------------------------------------------------------------------------------------------------------------------------------------------------------------------------------------------------------------------------------------------------------------------------------------------------------------------------------------------------------------------------------------------------------------------------------------------------------------------------------------------------------------------------------------------------------------------------------------------------------------------------------------------------------------------------------------------------------------------------------------------------------------------------------------------------------------------------------------------------------------------------------------------------------------------------------------------------------------------------------------------------------------------------------------------------------------------------------------------------------------------------------------------------------------------------------------------------------------|
| Journal:                      | <i>BMJ Open</i>                                                                                                                                                                                                                                                                                                                                                                                                                                                                                                                                                                                                                                                                                                                                                                                                                                                                                                                                                                                                                                                                                                                                                                                                                                                                        |
| Manuscript ID                 | bmjopen-2019-031400                                                                                                                                                                                                                                                                                                                                                                                                                                                                                                                                                                                                                                                                                                                                                                                                                                                                                                                                                                                                                                                                                                                                                                                                                                                                    |
| Article Type:                 | Protocol                                                                                                                                                                                                                                                                                                                                                                                                                                                                                                                                                                                                                                                                                                                                                                                                                                                                                                                                                                                                                                                                                                                                                                                                                                                                               |
| Date Submitted by the Author: | 02-May-2019                                                                                                                                                                                                                                                                                                                                                                                                                                                                                                                                                                                                                                                                                                                                                                                                                                                                                                                                                                                                                                                                                                                                                                                                                                                                            |
| Complete List of Authors:     | <p>Catley, Delwyn; Children's Mercy Hospitals and Clinics, Center for Children's Healthy Lifestyles &amp; Nutrition; University of Missouri Kansas City School of Medicine</p> <p>Puoane, Thandi; University of Western Cape, School of Public Health</p> <p>Tsolekile, Lungiswa; University of Western Cape, School of Public Health</p> <p>Resnicow, Ken; University of Michigan School of Public Health</p> <p>Fleming, Kandace; University of Kansas, Life Span Institute</p> <p>Hurley, Emily; Children's Mercy Hospitals and Clinics, Health Services and Outcomes</p> <p>Smyth, Joshua; Penn State College of Health and Human Development</p> <p>Vitolins, Mara; Wake Forest University School of Medicine, Department of Epidemiology &amp; Prevention</p> <p>Lambert, Estelle; University of Cape Town, UCT Research Centre for Health through Physical Activity, Lifestyle and Sport (HPALS), Division of Research Unit for Exercise Science and Sports Medicine, Faculty of Health Sciences</p> <p>Levitt, Naomi; University of Cape Town, Department of Medicine and Chronic Disease Initiative for Africa</p> <p>Goggin, Kathy; Children's Mercy Hospitals and Clinics, Health Services and Outcomes Research; University of Missouri Kansas City School of Medicine</p> |
| Keywords:                     | obesity, diabetes prevention program, low and middle-income countries, community health workers                                                                                                                                                                                                                                                                                                                                                                                                                                                                                                                                                                                                                                                                                                                                                                                                                                                                                                                                                                                                                                                                                                                                                                                        |
|                               |                                                                                                                                                                                                                                                                                                                                                                                                                                                                                                                                                                                                                                                                                                                                                                                                                                                                                                                                                                                                                                                                                                                                                                                                                                                                                        |

SCHOLARONE™  
Manuscripts

1  
2  
3  
4  
5  
6  
7  
8  
9  
10  
11  
12  
13  
14  
15  
16  
17  
18  
19  
20  
21  
22  
23  
24  
25  
26  
27  
28  
29  
30  
31  
32  
33  
34  
35  
36  
37  
38  
39  
40  
41  
42  
43  
44  
45  
46  
47  
48  
49  
50  
51  
52  
53  
54  
55  
56  
57  
58  
59  
60

## Adapting the Diabetes Prevention Program for low and middle-income countries: Protocol for a cluster randomized trial to evaluate “Lifestyle Africa”

Delwyn Catley<sup>1,2</sup>, Thandi Puoane<sup>3</sup>, Lungiswa Tsolekile<sup>3</sup>, Ken Resnicow<sup>4</sup>, Kandace K. Fleming<sup>5</sup>, Emily A. Hurley<sup>6</sup>, Joshua M. Smyth<sup>7</sup>, Mara Z. Vitolins<sup>8</sup>, Estelle V. Lambert<sup>9</sup>, Naomi S. Levitt<sup>10</sup>, & Kathy Goggin<sup>2,6,11</sup>

<sup>1</sup>Center for Children's Healthy Lifestyles and Nutrition, Children's Mercy Kansas City, Kansas City, MO, United States

<sup>2</sup>University of Missouri – Kansas City School of Medicine, Kansas City, MO, United States

<sup>3</sup>University of the Western Cape School of Public Health, Cape Town, South Africa

<sup>4</sup>University of Michigan School of Public Health, Ann Arbor, MI, United States

<sup>5</sup>University of Kansas, Lawrence, KS, United States

<sup>6</sup>Health Services and Outcomes Research, Children's Mercy Hospitals and Clinics, Kansas City, MO, United States

<sup>7</sup>College of Health and Human Development, Penn State University, Hershey, PA, United States

<sup>8</sup>Department of Epidemiology & Prevention,

<sup>9</sup>UCT Research Centre for Health through Physical Activity, Lifestyle and Sport (HPALS), Division of Research Unit for Exercise Science and Sports Medicine, Faculty of Health Sciences, University of Cape Town, Cape Town, South Africa

<sup>10</sup> Department of Medicine and Chronic Disease Initiative for Africa, Faculty of Health Sciences, University of Cape Town, Cape Town, South Africa

<sup>11</sup>University of Missouri – Kansas City School of Pharmacy, Kansas City, MO, United States

**§Corresponding Author:** Delwyn Catley, Children's Mercy Kansas City and University of Missouri - Kansas City, 2401 Gillham Road, Kansas City, MO 64108, +1 816 302-0232, dcatley@cmh.edu

Submitted May 1, 2019 (Version 1)

## Abstract

**Introduction:** Low and middle-income countries like South Africa are experiencing major increases in burden of non-communicable diseases such as diabetes and cardiovascular conditions. However, evidence-based interventions to address behavioral factors related to these diseases are lacking. Our study aims to adapt the CDC's National Diabetes Prevention Program (DPP) within the context of an under-resourced urban community in Cape Town, South Africa.

**Methods/analysis:** The new intervention (*Lifestyle Africa*) consists of 17 weekly sessions delivered by trained community health workers (CHW). In addition to educational and cultural adaptations of DPP content, the program adds novel components of text messaging and CHW training in motivational interviewing. We will recruit participants who are members of 28 existing community health clubs served by CHWs. In a two-year cluster randomized control trial, clubs will be randomly allocated to receive the intervention or usual care. After Year 1, usual care participants will also receive the intervention and both groups will be followed for another year. The primary outcome analysis will compare percentage of baseline weight loss at Year 1. Secondary outcomes will include diabetes and cardiovascular risk indicators (blood pressure, hemoglobin A1C, lipids), changes in self-reported medication use, diet (fat and fruit and vegetable intake), physical activity, and health-related quality of life. We will also assess potential psychosocial mediators/moderators as well as cost-effectiveness of the program.

**Ethics/dissemination:** Ethical approval was obtained from the University of Cape Town and Children's Mercy. Results will be submitted for publication in peer-reviewed journals and training curricula will be disseminated to local stakeholders.

**Trial registration:** NCT03342274

## Strengths and Limitations

- Community-engaged development ensures the intervention fits the cultural context and existing models of care.
- Broad participant inclusion criteria will help produce relevant, more generalizable findings.
- Cluster-randomized design will lead to a rigorous evaluation of the intervention.
- Biometric and biologic measures are rigorous outcome indicators.
- Low resource environment will make delivering the intervention reliably and with fidelity challenging.

## Introduction

The World Health Organization estimates that of the 56.4 million global deaths in 2015, almost 40 million (70%) were due to non-communicable diseases (NCDs)[1]. The leading causes were cardiovascular diseases (CVD) with a substantial number also coming from diabetes mellitus (DM). Over three-quarters of deaths attributed to NCDs in 2015 occurred in low and middle-income countries, where the disproportionate burden of NCDs is expected to continue to increase [1,2].

As a result of globalization and economic advancement, countries like South Africa are experiencing an “epidemiological transition” in which disease prevalence is shifting from primarily infectious disease and under-nutrition to primarily non-communicable diseases and over-nutrition [2]. These trends have been attributed to rising incomes and urbanization in low and middle-income countries which leads to a shift from eating unrefined carbohydrates to a greater intake of fats, sweeteners and animal source foods, as well as highly-processed foods, sometimes referred to as a “nutrition transition”[3,4]. The negative effects of this dietary change are compounded by reductions in physical activity, which are associated with urban lifestyles [5]. Contributing factors include the limited availability of affordable, healthy food in poorer areas, combined with the increased availability of fast foods and cheap snacks that are high in fats and sugar [6], sedentary employment [4,5], limited outdoor space and high rates of street violence [7–9]. Cultural beliefs and practices may also contribute. For example, obesity is less stigmatized, and even valued, in many African cultures because it is associated with dignity, wealth, and being treated well by one’s husband; whereas weight loss is regarded as a source of stigma and a sign of disease, in particular of HIV/AIDS [10].

Although signs of epidemiological transition have been observed in many low and middle income countries, studies suggest that the speed at which this transition appears to be occurring in South Africa is particularly striking [8,11–16]. Fifty-four percent of South African adults are overweight and 28.3% are obese—a statistic that has risen from 17.6% in 1996 and 22.9% in 2006 [17]. South African women have the highest prevalence of obesity in sub-Saharan Africa at 40% [18]. Furthermore, hypertension affects 46% of women and 44% of men nationally [19].

1  
2  
3 Considering the public health and economic impacts of NCDs, national and provincial health  
4 departments in South Africa have declared promotion of healthy lifestyles a public health priority [20].  
5  
6 Despite the need for effective and affordable interventions for combating DM and CVD, there is a dearth  
7  
8 of research devoted to developing and evaluating NCD interventions in low and middle income settings,  
9  
10 particularly in Africa. Globally, one of the most notable examples of effective interventions based on  
11  
12 lifestyle change is the Diabetes Prevention Program (DPP) which the Centers for Disease Control has  
13  
14 adopted and disseminated in the United States as the National DPP [21]. Through 16 core sessions  
15  
16 delivered by “lifestyle coaches”, the original DPP aimed for its participants to engage in at least 150  
17  
18 minutes of moderate physical activity per week and to reduce initial body weight by 7% over 6 months.  
19  
20 Its original randomized control trial (RCT) among individuals with impaired glucose tolerance reported a  
21  
22 58% reduction in DM incidence [22]. A more recent RCT examining long-term effects of a group-based  
23  
24 version of the DPP among 5,000 overweight and obese individuals with Type-2 DM (the Look AHEAD  
25  
26 trial) showed an average loss of 8.6% of initial body weight in the lifestyle intervention group (compared  
27  
28 to 0.7% for controls) and 4.7% at the 4-year follow-up [23–25]. In addition, there were significant  
29  
30 improvements in glucose control as well as reductions in blood pressure, triglycerides, HDL cholesterol  
31  
32 and medication use.  
33  
34  
35

36  
37 With evidence of its effectiveness among adults with pre-diabetes as well as adults with diabetes,  
38  
39 the DPP has also been adapted for several real-world settings within the U.S. including YMCAs [26,27],  
40  
41 African American Churches [28], community hospitals [29], community health-care facilities [30], as  
42  
43 well as through online social networks and mobile phone platforms [31]. Adaptions of the DPP designed  
44  
45 to be delivered by lay community health workers (CHWs) have also been successful [32,33]—some  
46  
47 achieving weight loss in the range of 6-7% [27,33], comparable to the 8.6% observed in the original trial  
48  
49 [23] and consistent with recommended weight loss goals for diabetes risk reduction [34].  
50

51  
52 Although the DPP has been shown to have strong outcomes when adapted for community settings  
53  
54 in the U.S., this adaptation has not yet been extended to low and middle-income settings. For example,  
55  
56 the mode of delivery in the United States has been through trained health or allied health professionals  
57  
58  
59

1  
2  
3 with post-graduate training and backgrounds in nutrition or behavior change [22]. This is not feasible in  
4 most low-resource environments due to costs and/or the lack of trained public-health professionals.  
5  
6 Delivering services at medical facilities may also hinder attendance because of the time loss and cost of  
7  
8 local travel. Furthermore, the content of sessions also needs to be adapted to be suitable for the prevailing  
9  
10 literacy and numeracy levels of both providers and recipients of the program, and to take into account the  
11  
12 unique food preferences, cooking and shopping patterns of the region. Cultural norms that affect food  
13  
14 preferences or attitudes about body weight or weight loss, as well as environmental barriers that affect  
15  
16 access to food or ability to exercise, need to be addressed. For example, many individuals in South Africa  
17  
18 live in crowded informal (shack) settlements that may lack reliable electricity, space, access to affordable  
19  
20 produce, cold storage of fresh food, and places that are safe to exercise. In addition to barriers, there may  
21  
22 be unique facilitators that can support intervention delivery in low and middle-income countries. For  
23  
24 example, many countries provide community-based care using CHWs offering opportunities to tap  
25  
26 existing social support networks and a community-based health infrastructure [35]. Also, cell phone use is  
27  
28 high offering the opportunity to deliver supportive text messages which have been shown to enhance the  
29  
30 effectiveness of behavior change interventions [36,37].  
31  
32  
33

34  
35 The purpose of our study is to use a community-engaged adaption process to develop and test a  
36  
37 new version of the DPP (“*Lifestyle Africa*”) tailored to overweight and obese adults in low-income, urban  
38  
39 areas of sub-Saharan Africa. The key adaption is to design the program so that it can be delivered by  
40  
41 CHWs. In South Africa CHWs are typically drawn from the local community and have similar levels of  
42  
43 education as the target population. Evaluation of *Lifestyle Africa* is based on a community-based cluster  
44  
45 randomized controlled trial (RCT) conducted in partnership with two NGOs that provide chronic disease  
46  
47 care to individuals with DM and/or CVD using CHWs. CHWs are used to provide medication delivery  
48  
49 and health monitoring to individuals who are members of “support groups” or “health clubs”. Care is  
50  
51 provided from approximately February through November each calendar year due to the year-end holiday  
52  
53 season during which most community members travel to their rural homes for an extended period. CHWs  
54  
55 and their associated support groups are randomized to receive *Lifestyle Africa* or to serve as a treatment-  
56  
57  
58  
59  
60

1  
2  
3 as-usual control. The primary outcome analysis will compare percentage weight loss from baseline to  
4 follow-up at the end of the year between *Lifestyle Africa* and usual care participants. Secondary outcomes  
5 are DM and cardiovascular risk indicators (blood pressure, hemoglobin A1C, lipids), changes in  
6 medication use, diet (fat, fruit and vegetable intake), physical activity, and health related quality of life  
7 (HRQOL).  
8  
9  
10  
11  
12

## 13 **Methods and Analysis**

### 14 **Setting:**

15  
16  
17  
18 This study is being conducted in the area of Khayelitsha, a fast-growing urban township of Cape Town,  
19 South Africa. Khayelitsha residents are 99% Black African and 97% Xhosa speaking [38]. Poverty is  
20 extremely high, with 38% of individuals unemployed and 89% earning less than R6,400 (approximately  
21 475 USD) per month. More than half of the residents are rural to urban migrants and 64% of adults have  
22 not completed high school [38]. There is a high prevalence of overweight and obesity [39] and prevalence  
23 of DM among Black Africans is approximately 13%, having increased more than 50% over 20 years [40].  
24  
25  
26  
27  
28  
29  
30  
31  
32  
33  
34

### 35 **Patient and Public Involvement:**

#### 36 *Community Partners*

37  
38 Project implementation is conducted in partnership with two well-established NGOs that use CHWs from  
39 the community to support the health of over 9,000 individuals in Khayelitsha and surrounding  
40 communities. Our intervention is delivered through adaptation of the NGO's existing programs that use  
41 CHWs to provide health-related services to small community groups or "clubs" of approximately 10-50  
42 individuals who meet in homes or community facilities. CHWs provide such services as health  
43 monitoring, medication delivery, education, physical activity, meals, wellness programming, and income  
44 generating activities. NGOs work collaboratively with local health clinics to both refer patients and  
45 receive referrals of patients many of whom have diabetes and cardiovascular disease. CHWs meet  
46 regularly (varying by NGO and club from daily to monthly) with their designated groups. Many groups  
47  
48  
49  
50  
51  
52  
53  
54  
55  
56  
57  
58  
59  
60



1  
2  
3 also function independently providing meals and social activities to members on a regular basis.  
4

#### 5 *Involvement in study design*

6

7 Our team's preliminary work involved extensive formative research with club members, CHWs  
8 and community leaders to better understand cultural norms, barriers and facilitators surrounding physical  
9 activity, diet and body image [10]. In partnership with CHWs, a training manual and pilot program was  
10 developed, which demonstrated the feasibility of using health clubs to encourage walking [41]. Additional  
11 pilot work included development and evaluation of three intervention sessions based on the DPP. Two  
12 pairs of CHWs were trained to deliver three DPP pilot sessions to participants, and both CHW and  
13 participant feedback were incorporated into the development of the complete program. To develop the  
14 complete *Lifestyle Africa* program for the present study, we formed two community advisory boards  
15 (CABs) in two Khayelitsha area neighborhoods to guide the development of a culturally appropriate and  
16 sustainable program. Members included a number of CHWs, community residents with DM and/or CVD,  
17 local experts in DM and CVD, and community leaders capable of guiding and supporting dissemination  
18 (e.g., a neighborhood elder and a representative of the provincial Department of Health). The CABs  
19 provide input and assistance with all aspects of the project including naming the intervention program,  
20 assisting with program development, reviewing intervention content and materials, and providing input  
21 on program logistics. Members attend quarterly meetings as well as participate in work groups focused on  
22 specific tasks (e.g., adapting the DPP manual, reviewing or trying out suggested adaptations of the DPP,  
23 or reviewing text messages).  
24  
25  
26  
27  
28  
29  
30  
31  
32  
33  
34  
35  
36  
37  
38  
39  
40  
41  
42  
43  
44

#### 45 **Trial Design:**

46

47 This is a 2-arm parallel group cluster RCT with balanced randomization (1:1) and a cross-over of  
48 the control arm after the main outcome assessment (Figure 1). CHWs mostly work individually or in pairs  
49 with a particular group, but in some cases CHWs work as trios or work with more than one group. For  
50 this reason, the unit of randomization is CHW "team" (individual, pair or trio). CHW teams randomized  
51 to intervention receive training and provide the intervention to their support groups. CHW teams  
52  
53  
54  
55  
56  
57  
58  
59  
60

1  
2  
3 randomized to control provide treatment as usual to their support groups. After approximately one year of  
4 intervention, control CHW teams are also trained in the intervention and their support groups are crossed  
5 over to the intervention arm. Participants in both arms are assessed at the end of the first and second year.  
6  
7  
8  
9

### 10 11 **Participants/Recruitment:**

12  
13 To recruit participants, two initial sessions were developed to introduce and explain the purpose  
14 and nature of the *Lifestyle Africa* program. CHWs are trained to deliver these sessions which follow a  
15 similar format to the main *Lifestyle Africa* sessions. At the introductory sessions, interested club members  
16 are invited to return for an eligibility screening and enrollment session. To serve our NGO partners and to  
17 be sensitive to community wishes, our goal is to invite all eligible members of 28 clubs (~18 members  
18 each) served by our partner NGOs to participate in the intervention and to enroll as many as feasible in  
19 the study. The eligibility criteria were therefore designed to be as inclusive of club members as possible.  
20 The inclusion criterion for support group members is being overweight or obese ( $BMI \geq 25$  kg/m<sup>2</sup>).  
21 Exclusion criteria are: (1) having an unsafe level of blood pressure [ $>160$  (systolic) and/or  $>100$  mm  
22 (diastolic)] [42], (2) elevated blood sugar [HbA1C  $> 11$ ] [42] (3) being pregnant, breast-feeding or  
23 planning pregnancy within two years; (4) chronic use of oral steroid medication (which may affect weight  
24 loss); and (5) not intending to stay in the group over the next two years.  
25  
26  
27  
28  
29  
30  
31  
32  
33  
34  
35  
36  
37  
38  
39  
40

### 41 **Randomization:**

42  
43 Randomization of support groups was conducted by the project statistician using a numbered list of  
44 the CHW teams and their associated groups. CHW teams are stratified within NGO. A computerized  
45 random number generator was used to create the allocation scheme. CHW groups have been randomized  
46 prior to enrollment of participants and launch of the intervention in order to know which CHWs need to  
47 be ready to deliver the intervention. It is therefore not feasible to blind CHWs or participants.  
48  
49  
50  
51  
52  
53  
54  
55  
56  
57  
58  
59  
60

## Interventions:

### (1) *Lifestyle Africa*

Adaptation of the DPP: In developing *Lifestyle Africa*, we aimed to retain key elements from the CDC National DPP [22,43] while making necessary cultural, educational, and language adaptations relevant to the community. CDC's National DPP consists of 16 "core" sessions delivered over 6 months and 15 "post-core" sessions focused on maintaining participants' engagement in the program. Participants are encouraged to lose 7% of body weight and exercise 150 mins/ week. Central components of the program include self-monitoring of caloric intake and physical activity along with other social-cognitive and problem-solving theory elements [43].

The primary adaptation was to eliminate the need for a high-level health professional (such a nutritionist or dietitian) to deliver the core sessions of the program by providing session content on video (Katula et al., 2011). With expert content provided via video the role of CHWs is to show the video, serve as group facilitator, and ensure engagement with the video material. Videos were developed in Xhosa and use a presenter/narrator in conjunction with photos and animation. Frequent pauses are built into the video session during which CHWs prompt participants with interactive questions and activities such as completing worksheets that reinforce and personalize video content. Activities are designed to minimize writing and allow for participants to engage orally if needed (e.g., through discussion with a partner.) Participants receive a program book in Xhosa (or English if preferred) with educationally and culturally adapted handouts and forms needed for each session (e.g., physical activity tracking sheets, goal setting forms). The visual elements of the video were designed to be culturally sensitive, for example by depicting the individuals and scenes representative of the target community. To aid CHWs, each video has an accompanying session guide that provides step-by-step guidance on materials, procedures and the verbal prompts and questions needed to facilitate the session. To avoid excessive session length the *Lifestyle Africa* program consists of 17 rather than 16 core sessions.

Other key adaptations included those made because, unlike the original DPP, participants in *Lifestyle Africa* are not actively seeking treatment in the form of lifestyle behavior change. Therefore, in

1  
2  
3 addition to the 17 core sessions, we created two additional “recruitment sessions” that follow the same  
4  
5 format (i.e., video delivered with pauses for discussion) to provide information on the rationale for  
6  
7 participating in a diet and exercise program. To account for participants’ levels of health literacy and  
8  
9 numeracy we expanded educational content (e.g., explained the physiology of diabetes and cardiovascular  
10  
11 disease; explained the meaning of a kilojoule), simplified explanations, reduced calculations, and  
12  
13 “chunked” information by interspersing it with discussion and related activities. We also bolstered  
14  
15 motivational aspects of the DPP through the addition of elements of Motivational Interviewing a method  
16  
17 of counseling designed to strengthen motivation by fostering participant’s own reasons for change (e.g.,  
18  
19 exploring personal values, asking participants to express their own reasons for change). According to  
20  
21 Motivational Interviewing principles the counselor’s style or manner of counseling is also important (e.g.,  
22  
23 person-centered and autonomy supportive rather than directive or persuasive; use of reflective listening  
24  
25 rather and open questions rather than closed questions and confrontation). For this reason a Motivational  
26  
27 Interviewing and group facilitation skills training curriculum was also developed for CHWs to provide the  
28  
29 skills necessary for delivering the sessions in a Motivational Interviewing consistent manner[44].  
30  
31

32  
33 A final adaptation capitalizes on the widespread use of cell phones in the developing world and  
34  
35 increasing evidence of the potential benefit of text messaging to help promote behavior change [37]. A  
36  
37 empirically based text message system was developed in which participants are provided with two  
38  
39 messages per day (morning and lunch time) to provide reminders, foster motivation and self-efficacy,  
40  
41 affirm ongoing efforts, and help with implementation planning (i.e., behavior change tips). The same  
42  
43 messages are delivered to all participants, but weekly message content refers to each of the core sessions  
44  
45 and is timed to match the participant’s session progress.  
46

47  
48 In addition to the video-based core sessions 12 post-core sessions were developed. These are  
49  
50 reduced in length but follow the same format (weigh-in, review and discussion of progress toward goal(s)  
51  
52 from the prior session, delivery and discussion of new content, goal setting for the next session). New  
53  
54 content is brief and delivered by the CHW using scripted language and straightforward handouts.  
55  
56  
57  
58  
59

1  
2  
3 CHW training: CHWs working for our partner NGOs are not required to have any specific  
4  
5 educational background but must have basic reading, writing, and arithmetic skills sufficient to maintain  
6  
7 attendance registers, medication logs, and assess and record weight, height etc. CHWs also have received  
8  
9 basic training as part of their employment as CHWs (e.g., in home-based care, chronic disease  
10  
11 management, and wellness). Training for *Lifestyle Africa* facilitators consists of 3 days of didactic training  
12  
13 and 8 weekly half day sessions of experiential training as mock *Lifestyle Africa* participants conducted in  
14  
15 Xhosa by local research team members. Didactic training includes basic training in diabetes and diabetes  
16  
17 management, behavior change principles, Motivational Interviewing, and group facilitation. CHWs are  
18  
19 also trained in use of the video projectors, and logistical and study-related safety procedures. Content of  
20  
21 Motivational Interview training was also adapted to limit jargon, and to adapt concepts and experiential  
22  
23 learning activities to CHW cultural values, language and educational level. For example, “MI Spirit” was  
24  
25 distilled as “What is effective counseling?” and focused on the need to listen and reflect before giving  
26  
27 advice. Experiential training involved CHWs discussing their own experiences with making behavior  
28  
29 change. “Evocation and eliciting change talk” was described in terms of “building motivation or ‘a strong  
30  
31 why’”. Experiential training involved exploring goals and values related to behavior change. Content was  
32  
33 adapted to be culturally relevant (e.g., use of culturally relevant values such as “at peace with ancestors”).  
34  
35 With regard to MI core skills, training and practice emphasized the use of open-ended questions and  
36  
37 reflections.  
38  
39

40  
41 CHW’s reviewed and practiced key activities after each session (e.g., conduct weigh in, conduct  
42  
43 opening facilitation, provide feedback on food logs) during their training as mock *Lifestyle Africa*  
44  
45 participants. In subsequent mock sessions (where these activities were repeated) they were asked on a  
46  
47 rotational basis to act as facilitators (e.g., lead the opening facilitation, facilitate goal-setting and action  
48  
49 planning). A checklist was used to confirm all CHW’s had satisfactorily conducted all key elements of the  
50  
51 program.  
52

53 Delivery: To avoid disruption of the study during the year-end holiday season that is widely  
54  
55 observed in the community, enrollment takes place in February and March following the break and  
56  
57  
58  
59

1  
2  
3 intervention begins immediately after each club is enrolled. Control group clubs begin the intervention  
4 one year after the intervention arm begins. CHWs are asked to deliver the program weekly (or biweekly if  
5 needed to fit the schedule of the group) but adjustments are made to allow for days when club members  
6 do not meet (e.g., on days when many members collect pension payments or days of neighborhood  
7 disruptions due to protests etc.). Session attendance, weight, and activity minutes are tracked by CHWs  
8 using standardized forms. After clubs complete the 17 core sessions they continue with monthly sessions  
9 until the final assessment.  
10  
11  
12  
13  
14  
15  
16

17  
18 Fidelity Monitoring: Research staff will observe at least the first ten sessions for each CHW team  
19 and taper observations over time to at least one session every 5-8 weeks. Checklists are used to verify  
20 adherence to key session protocol elements (e.g., completed weigh in, followed verbal prompts, used  
21 projector correctly etc.). Adherence to MI principles and group facilitation behaviors are evaluated using  
22 rating scales (poor/never to excellent/always) adapted from the OnePass measure for MI competence [45].  
23  
24  
25  
26  
27  
28  
29

### 30 (2) *Usual care (wait list)*

31  
32 For clubs randomized to usual care, CHWs continue to lead clubs in their usual activities (e.g.,  
33 approximately monthly monitoring of weight, blood pressure and blood glucose, delivery of medication).  
34 Although usual care may include education and health monitoring, there is no systematic, structured  
35 means by which lifestyle change is facilitated on an ongoing basis.  
36  
37  
38  
39  
40  
41  
42

### 43 **Data Collection:**

44  
45 Clubs are enrolled in two waves separated by 12 months. Each wave follows the same procedure  
46 for enrollment and assessment (see Figure 1). Recruitment and enrollment of each wave takes  
47 approximately two months over February and March of the calendar year. The baseline assessment is  
48 conducted at enrollment. Follow-up assessments occur at the end of the enrollment year (approximately 8  
49 months after enrollment) and the end of the second year (approximately 20 months after enrollment).  
50  
51  
52  
53  
54  
55  
56 These follow-up assessments are timed to occur before most participants leave for their December-  
57  
58  
59  
60

1  
2  
3 January holiday season break. The follow-up assessment at the end of Year 1 is the main outcome time  
4 point. The follow-up assessment at the end of Year 2 is used to evaluate long term outcomes for the  
5 intervention arm as well as the effects of the control arm receiving the intervention. Consistent with local  
6 norms participants receive a R150 (approximately \$12USD) gift voucher for completing each assessment.  
7  
8  
9

10  
11 Assessments are conducted by study staff who travel to club sites or nearby suitable locations. At  
12 enrollment, club members complete informed consent, eligibility screening, and baseline assessment. All  
13 participants are assessed on demographics, eligibility criteria, and key outcome measures (i.e., Body Mass  
14 Index [BMI], blood pressure, and HbA1c). At the end of assessments, study staff give each participant a  
15 feedback form with their biometric data and explain their results. Due to resource limitations and  
16 logistics, only a randomly selected sub-sample of 12 participants per club complete the lipids and self-  
17 report survey assessments described below. All survey measures were translated to Xhosa and back-  
18 translated to English. During this process, we applied some minor cultural adaptations to increase  
19 relevance and comprehensibility of certain items and also harmonized some response scales across  
20 instruments to reduce complexity for respondents. All data are collected by trained Xhosa speaking  
21 interviewers using tablets and the REDCap data management system [46].  
22  
23  
24  
25  
26  
27  
28  
29  
30  
31  
32  
33  
34  
35  
36

### 37 **Measures:**

38  
39 The primary outcome will be percentage of weight lost between baseline and the first follow-up  
40 assessment. Weight is measured to the half kilogram with a standard electronic scale. Participants are  
41 asked to wear light clothing and to fast the morning of enrollment. They are asked to remove footwear,  
42 heavy clothing/accessories prior before being weighed. Height is measured in order to calculate Body  
43 Mass Index (BMI) to determine eligibility. Height is measured to the nearest millimeter with the  
44 participant standing straight against a standard stadiometer. BMI is calculated as weight in kilograms  
45 divided by the square of height in meters.  
46  
47  
48  
49  
50  
51  
52

53  
54 Blood pressure is assessed by staff with calibrated portable automated instruments (Omrons  
55 HBP1300), averaging two or three independent measurements according to American Heart Association  
56  
57  
58  
59



1  
2  
3 Council on High Blood Pressure Research Methods [49]. Non-fasting HbA1c, triglycerides, and LDL  
4 cholesterol are measured via automated assay from a capillary sample using an Afinion AS100 analyzer  
5 [47]. Medication use is assessed by asking participants to bring all their medications to the enrollment  
6 session. Interviewers recorded the medication name and dose including use of HIV antiretroviral  
7 medications.  
8  
9

10  
11  
12  
13 Demographic measures are assessed via participant survey and include age, gender, education  
14 level, income level, and housing type. Dietary intake focuses on intake of whole grains, fruits and  
15 vegetables, fiber, and sugar, measured with an adaptation of the NHANES Dietary Screener Questionnaire  
16 [51,52]. Physical activity is measured using the International Physical Activity Questionnaire-Short Form  
17 [53], and health-related quality of life is measured with the Veterans RAND 12-item Health Survey  
18 [54,55].  
19  
20  
21  
22  
23  
24  
25  
26  
27

## 28 **Data Analysis:**

### 29 *Power analysis*

30  
31  
32  
33 Power analyses were conducted using the Optimal Design software for cluster-randomized trials  
34 with person-level outcomes. Prior studies of lifestyle interventions have indicated that the intra-class  
35 correlation coefficient (ICC) of the main outcome (percent weight loss) will likely be small (e.g., .01).  
36 Therefore, values of .01 and .05 were considered in the power analysis for conservative estimation.  
37 Because of the community-based nature of the trial, the study committed to enroll as many eligible and  
38 interested club members as possible. The power analysis was therefore used to determine the adequacy of  
39 the anticipated sample size. At the time of conducting our power analysis, we had one NGO partner and  
40 anticipated a sample of 54 clusters averaging approximately 10 participants each for a total N of 540.  
41 However, government changes in NGO designated areas of responsibility and withdrawal from  
42 participation in the trial of one branch of our NGO partner changed our plans. After recruiting a second  
43 NGO partner we anticipate 28 total clusters averaging 18-19 participants for a total N of 518. In order to  
44 allow for up to 25% attrition, cluster sizes of 19 and 15 were included in the power analysis. Assuming an  
45  
46  
47  
48  
49  
50  
51  
52  
53  
54  
55  
56  
57  
58  
59  
60



1  
2  
3 ICC of .01, we projected that we would have 0.80 power to detect even small effect sizes of 0.28 and 0.31  
4  
5 with cluster sample sizes of 19 and 15 respectively. If we conservatively assume an ICC of 0.05, we  
6  
7 projected we would still have 0.80 power to detect effect sizes of 0.35 and 0.37 with sample sizes of 19  
8  
9 and 15 per cluster. Using the pooled standard deviation from Look AHEAD (5.8), the largest trial of  
10  
11 overweight/obese type-2 diabetic patients [24] and a conservative estimate of a 3.15% weight loss for the  
12  
13 treatment group and a 1% loss for the control group, a conservative estimated effect size for weight-loss  
14  
15 in the current study would be 0.37. This estimate is larger than the effect we will be able to detect with .80  
16  
17 power as we will be able to detect a percent weight loss difference of 1.6-1.7% between groups.  
18  
19  
20  
21

### 22 *Planned analytic strategy*

23  
24 To accommodate the cluster randomized design, all analyses will be conducted with a multilevel  
25  
26 modeling framework using SAS PROC MIXED. In this design, participants (Level-1 units) will be nested  
27  
28 within CHW pairs (Level-2 units). Primary analyses will use an intention-to-treat strategy. Exploratory  
29  
30 analyses will also examine low vs. high dose (i.e., sessions attended) effects. Unconditional models will  
31  
32 be examined with each dependent variable to determine the amount of between and within cluster  
33  
34 variance. Some questions involve comparison of effects between conditions and some involve change  
35  
36 within a condition.  
37  
38

39 Preliminary analyses will examine baseline equivalence across the two treatment conditions on  
40  
41 variables that may impact outcome (e.g., medication use) to identify covariates for the main analyses. To  
42  
43 address the primary research question regarding differences in % weight loss at the end of Year 1, %  
44  
45 weight loss from baseline to the end of Year 1 will be the dependent variable in the multi-level model  
46  
47 described above. The significance of the fixed effect for treatment group will indicate if there are  
48  
49 differences in overall outcomes across groups. Anticipated effects are directional in that *Lifestyle Africa*  
50  
51 participants should respond better than control participants. Similar models will be evaluated for each of  
52  
53 the secondary outcomes. Relevant covariates will be added to the models as appropriate (e.g., use of  
54  
55 diabetic medications for weight loss).  
56  
57  
58  
59  
60

1  
2  
3 To determine if the *Lifestyle Africa* intervention group maintains its response to the intervention over  
4 the second year, scores at the Year 1 assessment will be compared to those at the Year 2 assessment.  
5  
6 Random intercepts for health club and participant nested within health club will be included in the model.  
7  
8 The significance of the fixed effect for time will indicate whether or not participants were able to  
9  
10 maintain their response. This type of maintenance model will be evaluated for each of the outcomes of  
11  
12 interest individually. Similar models will be used to examine intervention response within each of the  
13  
14 study arms to determine if intervention effectiveness is replicated in the control group. If there are no  
15  
16 differences between groups in the assessments taken just prior to participating in the *Lifestyle Africa*  
17  
18 intervention, we will combine the groups and examine potential predictors of treatment effectiveness such  
19  
20 as fidelity at level two and attendance at level one.  
21  
22  
23  
24  
25

### 26 **Monitoring:**

27  
28 A Data Safety Monitoring Board (DSMB) oversees the study and approved the stopping rules.  
29  
30 The DSMB operates independently from the study investigators and the funder and comprises members  
31  
32 based in the United States and South Africa and includes a psychologist, a physician, a doctor of public  
33  
34 health, and a statistician with expertise relevant to the trial. Details of the DSMB operating procedures are  
35  
36 described in the DSMB charter. The DSMB may require termination (stopping rules) or modification of  
37  
38 the study for: (1) any perceived safety concern including concerns related to adverse events or (2) because  
39  
40 of severe failure to recruit or retain participants. There is no interim analysis or stopping rule related to an  
41  
42 interim analysis because the intervention involves minimal risk to participants and even in the absence of  
43  
44 indications of weight loss, the intervention may yield other educational or psychological benefits. In  
45  
46 addition, stopping for reasons other than safety could be negatively perceived by community partners,  
47  
48 CHWs, and club members. As part of usual care, CHWs and supervising nurses monitor the health of  
49  
50 participants and refer patients to their physician, or local health clinic, or emergency service as needed.  
51  
52 Study staff continuously monitor unanticipated problems or serious adverse events which can be  
53  
54 identified by CHWs, NGO staff, participants, participants' families, participants' physicians or other  
55  
56  
57  
58  
59  
60

1  
2  
3 health professionals. Events are investigated, documented, and reported to the principal investigators who  
4 report to the DSMB in accord with their regulations and to the Institutional Review Board (IRB) and the  
5 funder if appropriate.  
6  
7  
8  
9

### 10 11 **Ethics and Dissemination**

12  
13 Our study protocol has been approved by the Institutional Review Boards (IRBs) at the  
14 University of Cape Town (the primary IRB) and Children's Mercy Kansas City and the University of the  
15 Western Cape. Any amendments are approved by the IRB. Protocol modifications are communicated to  
16 study staff during regular meetings and when relevant, to CHWs and participants through personal  
17 outreach and through regular meetings with NGO partners. Written informed consent is collected from all  
18 participants prior to eligibility screening and enrollment. Multiple protections for participant  
19 confidentiality are in place. Participant identifiers (name and contact information) are marked as an  
20 identifier in REDCap and are then censored when the database is downloaded for analysis. Only trained  
21 study staff have access to REDCap databases during data collection. All identifying information will be  
22 removed with the deletion of the REDCap project at the end of the study. Consent forms and signature  
23 logs for reimbursements will be secured in a locked file cabinet within a locked office on a secured floor.  
24  
25  
26  
27  
28  
29  
30  
31  
32  
33  
34  
35  
36

37 A full data package will be maintained by the investigators for at least seven years after data  
38 collection is complete. Third-party access to the full data package will be addressed by the investigators  
39 on a case-by-case basis. Results will be disseminated through publication in peer-reviewed journals and  
40 conference presentations. *Lifestyle Africa* curricula will be made available to local stakeholders such as  
41 Universities and the Department of Health. Study progress and findings will also be updated on  
42 clinicaltrials.gov (#NCT03342274).  
43  
44  
45  
46  
47  
48  
49  
50  
51

### 52 **Discussion**

53  
54 The growing burden of NCDs in low and middle-income countries presents a critical need for  
55 evidence-based interventions that address behavioral contributors to the prevention and management of  
56  
57  
58  
59  
60

1  
2  
3 CVD and DM. Our study aims to adapt one of the strongest existing evidence-based lifestyle behavior  
4 change interventions to the context of low-income, under-resourced urban areas of sub-Saharan Africa  
5 and rigorously assess its impact in a cluster RCT. Results will inform both the feasibility and  
6 effectiveness of an intervention delivery model that uses CHWs as facilitators, video as the primary  
7 medium for delivering content, and enhancement of the DPP with Motivational Interviewing principles  
8 and a text message system. This will be an important addition to similar efforts that have targeted more  
9 educated and resourced populations in India [48].

10  
11  
12  
13  
14  
15  
16  
17  
18 Successful outcomes will hinge on both successful program delivery as well as participant  
19 engagement and retention. The main outcomes will therefore need to be interpreted in the context of key  
20 aspects of study implementation including the success of training CHWs, the reliability and fidelity with  
21 which sessions are delivered, and the engagement of participants. Upon completion of the study, a process  
22 evaluation is planned to enhance understanding of the outcomes by assessing CHW and participant  
23 perspectives on the strengths and weaknesses of the program. Through training and technical support the  
24 project also aims to build capacity in partner NGOs to continue the program after the study has been  
25 completed.

26  
27  
28  
29  
30  
31  
32  
33  
34  
35 Strengths of the study include its community engaged development process which has led to an  
36 intervention design that fits with the existing models of care of our partner NGOs and may be transferable  
37 to programs aimed at other NCDs. The study's pragmatic design, including broad inclusion criteria,  
38 should also lead to findings that are relevant and generalizable to many communities in low and middle-  
39 income countries. Although the study is pragmatic and the result of a community-engaged process, it uses  
40 a rigorous cluster randomized design with objective measurements of key biometric and biologic  
41 outcomes related to diabetes and cardiovascular disease. Chief among the challenges of the trial will be to  
42 achieve adequate reliability and fidelity in the delivery of the intervention in the context of an  
43 impoverished environment where resources are limited, residents are taxed trying to meet their basic  
44 needs, and social disruptions (e.g., strikes, protests, crime) are frequent. Limitations include low precision  
45  
46  
47  
48  
49  
50  
51  
52  
53  
54  
55  
56  
57  
58  
59  
60

1  
2  
3 of measures like dietary and physical activity recalls as well as limitations of measure breadth due to low  
4 literacy.  
5

6  
7           Regardless of the efficacy findings of the study, results should provide an important first step in  
8 understanding how lifestyle interventions such as the DPP might be disseminated in similar communities  
9 with few resources and low levels of education and literacy. Studies evaluating lifestyle behavior change  
10 interventions in low and middle-income countries are vital for addressing the epidemic of diabetes and  
11 cardiovascular disease.  
12  
13  
14  
15  
16

17  
18  
19  
20 **Figure legend:** Figure 1: Flow of study procedures (repeated for each of two waves of participants)  
21  
22  
23  
24

---

## 25 26 27 **Acknowledgements**

28  
29 The authors acknowledge the contributions made by our Community Advisory Board in designing this  
30 study.  
31  
32  
33

## 34 35 36 **Competing Interests**

37  
38 The authors declare no competing interests.  
39  
40  
41

## 42 43 **Author Contributions**

44 All authors made substantial contributions to the design of the study. DC and EAH drafted the manuscript  
45 and all others contributed to revising it critically for important intellectual content. All authors reviewed  
46 and approved of the final version submitted for publication and agree to be accountable for all aspects of  
47 the work in ensuing that questions related to accuracy and integrity are appropriately investigated and  
48 resolved.  
49  
50  
51  
52  
53  
54  
55  
56  
57  
58  
59  
60

**Funding**

This work was supported by National Heart Lung and Blood Institute of the National Institutes of Health under award number R01HL126099. The content is solely the responsibility of the authors and does not necessarily represent the official views of the National Institutes of Health.

For peer review only

## References

- 1 World Health Organization. Global health estimates 2015: deaths by cause, age, sex, by country and by region. Geneva: 2016.  
[http://www.who.int/healthinfo/global\\_burden\\_disease/estimates/en/index1.html](http://www.who.int/healthinfo/global_burden_disease/estimates/en/index1.html)
- 2 Mathers CD, Loncar D. Projections of global mortality and burden of disease from 2002 to 2030. *PLoS Med* 2006;**3**:2011–30. doi:10.1371/journal.pmed.0030442
- 3 Drewnowski A, Popkin BM. The nutrition transition: new trends in the global diet. *Nutr Rev* 1997;**55**:31–43. doi:10.1111/j.1753-4887.1997.tb01593.x
- 4 Popkin BM. The Nutrition Transition in the Developing World. *Dev Policy Rev* 2003;**21**:581–97. doi:10.1111/j.1467-8659.2003.00225.x
- 5 Kruger HS, Venter CS, Vorster HH. Physical inactivity as a risk factor for cardiovascular disease in communities undergoing rural to urban transition: the THUSA study. *Cardiovasc J South Africa* 2003;**14**:16–23. <http://www.ncbi.nlm.nih.gov/pubmed/12621539>
- 6 Beaglehole R, Yach D. Globalisation and the prevention and control of non-communicable disease: The neglected chronic diseases of adults. *Lancet*. 2003;**362**:903–8. doi:10.1016/S0140-6736(03)14335-8
- 7 Bradley HA, Puoane T. Prevention of hypertension and diabetes in an urban setting in South Africa: participatory action research with community health workers. *Ethn Dis* 2007;**17**:49–54.
- 8 Bourne LT, Lambert E V, Steyn K. Where does the black population of South Africa stand on the nutrition transition? *Public Health Nutr* 2002;**5**. doi:10.1079/PHN2001288
- 9 Friel S, Chopra M, Satcher D. Unequal weight: equity oriented policy responses to the global obesity epidemic. *BMJ* 2007;**335**:1241–3. doi:10.1136/bmj.39377.622882.47
- 10 Puoane T, Bradley H, Hughes G. Community intervention for the emerging epidemic of non-communicable diseases. *South African J Clin Nutr* 2006;**19**:56–62. doi:10.1080/16070658.2006.11734094
- 11 Reddy SP, Resnicow K, James S, *et al*. Underweight, overweight and obesity among South

- 1  
2  
3 African adolescents: Results of the 2002 National Youth Risk Behaviour Survey. *Public Health*  
4  
5 *Nutr* 2009;**12**:203–7. doi:10.1017/S1368980008002656  
6  
7  
8 12 Steyn K, Kazenellenbogen JM, Lombard CJ, *et al*. Urbanization and the risk for chronic diseases  
9  
10 of lifestyle in the black population of the Cape Peninsula, South Africa. *J Cardiovasc Risk*  
11  
12 1997;**4**:135–42. <http://www.ncbi.nlm.nih.gov/pubmed/9304495>  
13  
14 13 Sliwa K, Wilkinson D, Hansen C, *et al*. Spectrum of heart disease and risk factors in a black urban  
15  
16 population in South Africa (the Heart of Soweto Study): a cohort study. *Lancet* 2008;**371**:915–22.  
17  
18 doi:10.1016/S0140-6736(08)60417-1  
19  
20 14 Steyn K, Sliwa K, Hawken S, *et al*. Risk factors associated with myocardial infarction in Africa:  
21  
22 the INTERHEART Africa study. *Circulation* 2005;**112**:3554–61.  
23  
24 doi:10.1161/CIRCULATIONAHA.105.563452  
25  
26 15 Tibazarwa K, Ntyintyane L, Sliwa K, *et al*. A time bomb of cardiovascular risk factors in South  
27  
28 Africa: Results from the Heart of Soweto Study ‘Heart Awareness Days’. *Int J Cardiol*  
29  
30 2009;**132**:233–9. doi:10.1016/j.ijcard.2007.11.067  
31  
32  
33 16 Steyn NP, Bradshaw D, Norman R, *et al*. Dietary changes and the health transition in South  
34  
35 Africa: implications for health policy. In: *The double burden of malnutrition: Case Studies from*  
36  
37 *six developing countries*. 2006. 259–303. <http://www.fao.org/docrep/009/a0442e/a0442e00.HTM>  
38  
39 17 World Health Organization. Prevalence of obesity among adults, BMI  $\geq$  30, age-standardized:  
40  
41 Estimates by country. Glob. Heal. Obs. Data Repos.  
42  
43 2017. <http://apps.who.int/gho/data/node.main.A900A?lang=en>  
44  
45 18 Marie N, Flemming T, Robinson M, *et al*. Global, regional, and national prevalence of overweight  
46  
47 and obesity in children and adults during 1980–2013: a systematic analysis for the Global Burden  
48  
49 of Disease Study 2013. *Lancet*. 2013;**384**:766–81. doi:10.1016/S0140-6736(14)60460-8  
50  
51 19 National Department of Health (NDoH), Statistics South Africa (Stats SA), (SAMRC) SAMRC, *et*  
52  
53 *al*. South Africa Demographic and Health Survey 2016: Key Indicators. Pretoria, South Africa,  
54  
55 and Rockville, Maryland, USA: 2017.  
56  
57  
58  
59  
60



- 1  
2  
3 20 Republic of South Africa Department of Health. Strategy for the prevention and control of obesity  
4 in South Africa 2015-2020. Pretoria: 2016.  
5  
6  
7 21 DPP Research Group. National Diabetes Prevention Program.  
8  
9 <http://www.cdc.gov/diabetes/prevention/>  
10  
11 22 Knowler WC, Barrett-Connor E, Fowler SE, *et al.* Reduction in the incidence of type 2 diabetes  
12 with lifestyle intervention or metformin. *N Engl J Med* 2002;**346**:393–403.  
13  
14  
15 doi:10.1056/NEJMoa012512  
16  
17 23 The Look AHEAD research group, Look AHEAD Research Group LAR, Pi-Sunyer X, *et al.*  
18  
19 Reduction in weight and cardiovascular disease risk factors in individuals with type 2 diabetes:  
20 one-year results of the look AHEAD trial. *Diabetes Care* 2007;**30**:1374–83. doi:10.2337/dc07-  
21  
22  
23  
24  
25 0048  
26  
27 24 Wadden TA, West DS, Neiberg RH, *et al.* One-year weight losses in the look AHEAD study:  
28  
29 Factors associated with success. *Obesity* 2009;**17**:713–22. doi:10.1038/oby.2008.637  
30  
31 25 Wadden TA, Neiberg RH, Wing RR, *et al.* Four-year weight losses in the look AHEAD study:  
32  
33 Factors associated with long-term success. *Obesity* 2011;**19**:1987–98. doi:10.1038/oby.2011.230  
34  
35 26 Ackermann RT, Marrero DG. Adapting the Diabetes Prevention Program lifestyle intervention for  
36  
37 delivery in the community: The YMCA model. *Diabetes Educ.* 2007;**33**:69–78.  
38  
39  
40  
41  
42 27 Ackermann RT, Finch EA, Brizendine E, *et al.* Translating the Diabetes Prevention Program into  
43  
44 the Community. The DEPLOY Pilot Study. *Am J Prev Med* 2008;**35**:357–63.  
45  
46  
47  
48  
49  
50  
51  
52  
53  
54 29  
55  
56  
57  
58  
59  
60

- 1  
2  
3 doi:10.1177/0145721709332815  
4  
5 30 Amundson HA, Butcher MK, Gohdes D, *et al.* Translating the diabetes prevention program into  
6 practice in the general community: Findings from the Montana cardiovascular disease and diabetes  
7 prevention program. *Diabetes Educ* 2009;**35**:209–23. doi:10.1177/014572170933269  
8  
9  
10  
11 31 Joiner KL, Nam S, Whittemore R. Lifestyle interventions based on the diabetes prevention  
12 program delivered via eHealth: A systematic review and meta-analysis. *Prev. Med. (Baltim).*  
13 2017;**100**:194–207. doi:10.1016/j.ypmed.2017.04.033  
14  
15  
16  
17 32 Ali MK, Echouffo-Tcheugui J, Williamson DF. How effective were lifestyle interventions in real-  
18 world settings that were modeled on the diabetes prevention program? *Health Aff* 2012;**31**:67–75.  
19 doi:10.1377/hlthaff.2011.1009  
20  
21  
22  
23  
24 33 Ruggiero L, Castillo A, Quinn L, *et al.* Translation of the diabetes prevention program’s lifestyle  
25 intervention: Role of community health workers. *Curr. Diab. Rep.* 2012;**12**:127–37.  
26  
27  
28  
29 doi:10.1007/s11892-012-0254-y  
30  
31 34 Klein S, Sheard NF, Pi-Sunyer X, *et al.* Weight Management Through Lifestyle Modification for  
32 the Prevention and Management of Type 2 Diabetes: Rationale and Strategies. *Diabetes Care*  
33 2004;**27**:2067–73. doi:10.2337/diacare.27.8.2067  
34  
35  
36  
37 35 Bangdiwala SI, Fonn S, Okoye O, *et al.* Workforce resources for health in developing countries.  
38 *Public Health Rev.* 2010;**32**:296–318. doi:10.1007/BF03391604  
39  
40  
41 36 Lester RT, Gelmon L, Plummer FA. Cell phones: Tightening the communication gap in resource-  
42 limited antiretroviral programmes? [5]. *AIDS.* 2006;**20**:2242–4.  
43  
44  
45  
46 doi:10.1097/QAD.0b013e3280108508  
47  
48 37 Cole-Lewis H, Kershaw T. Text messaging as a tool for behavior change in disease prevention and  
49 management. *Epidemiol. Rev.* 2010;**32**:56–69. doi:10.1093/epirev/mxq004  
50  
51  
52 38 Statistics South Africa (Stats SA). Census 2011 statistical release. Pretoria: 2012.  
53  
54 39 Malhotra R, Hoyo C, Østbye T, *et al.* Determinants of obesity in an urban township of South  
55 Africa. *South African J Clin Nutr* 2008;**21**:315–20. doi:10.1080/16070658.2008.11734173  
56  
57  
58  
59  
60

- 1  
2  
3 40 Peer N, Steyn K, Lombard C, *et al.* Rising Diabetes Prevalence among Urban-Dwelling Black  
4 South Africans. *PLoS One* 2012;**7**. doi:10.1371/journal.pone.0043336  
5  
6  
7 41 Puoane TR, Tsolekile L, Igumbor EU, *et al.* Experiences in developing and implementing health  
8 clubs to reduce hypertension risk among adults in a south african population in transition. *Int. J.*  
9  
10  
11  
12  
13  
14 42 Research TLA. Baseline characteristics of the randomized cohort from the Look AHEAD (Action  
15 for Health in Diabetes) Research Study. *Dianestes Vasc Res* 2006;**3**:202–15.  
16  
17  
18  
19  
20 43 Venditti EM, Kramer MK. Necessary components for lifestyle modification interventions to  
21 reduce diabetes risk. *Curr Diab Rep* 2012;**12**:138–46. doi:10.1007/s11892-012-0256-9  
22  
23  
24 44 Miller WR, Rollnick S. *Motivational Interviewing, Third Edition: Helping People Change*. 2012.  
25  
26  
27  
28  
29 45 McMaster F, Resnicow K. Validation of the one pass measure for motivational interviewing  
30 competence. *Patient Educ Couns* 2015;**98**:499–505. doi:10.1016/j.pec.2014.12.014  
31  
32  
33 46 Harris PA, Taylor R, Thielke R, *et al.* Research electronic data capture (REDCap)-A metadata-  
34 driven methodology and workflow process for providing translational research informatics  
35 support. *J Biomed Inform* 2009;**42**:377–81. doi:10.1016/j.jbi.2008.08.010  
36  
37  
38  
39 47 Arabadjief M, Nichols JH. Evaluation of the afinion AS100 point-of-care analyzer for hemoglobin  
40 A1c. *Point Care* 2009;**8**:11–5. doi:10.1097/POC.0b013e3181971cef  
41  
42  
43 48 Sathish T, Williams ED, Pasricha N, *et al.* Cluster randomised controlled trial of a peer-led  
44 lifestyle intervention program: Study protocol for the Kerala diabetes prevention program. *BMC*  
45  
46  
47  
48  
49  
50  
51  
52  
53  
54  
55  
56  
57  
58  
59  
60

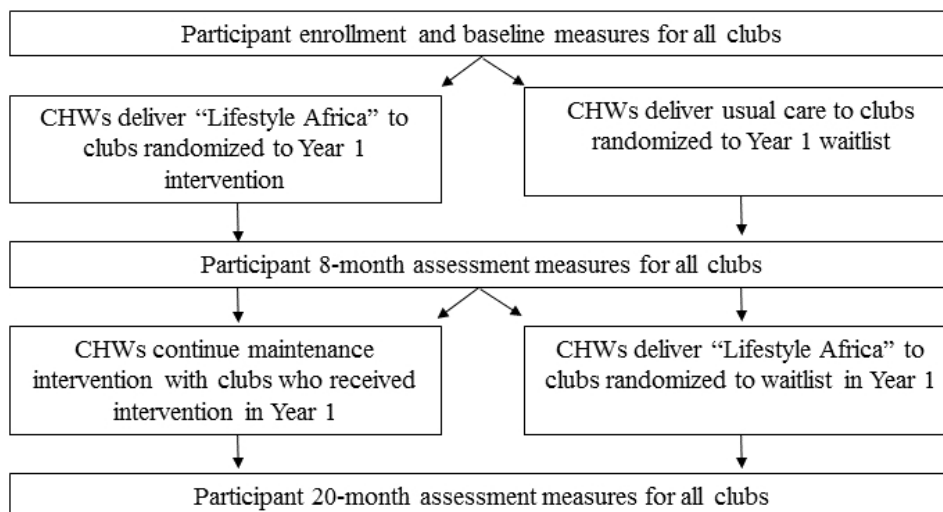

Flow of study procedures (repeated for each of two waves of participants)

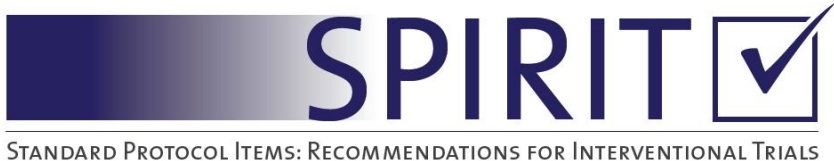

1  
2  
3  
4  
5  
6  
7  
8  
9  
10  
11  
12  
13  
14  
15  
16  
17  
18  
19  
20  
21  
22  
23  
24  
25  
26  
27  
28  
29  
30  
31  
32  
33  
34  
35  
36  
37  
38  
39  
40  
41  
42  
43  
44  
45  
46

SPIRIT 2013 Checklist: Recommended items to address in a clinical trial protocol and related documents\*

| Section/item                      | Item No | Description                                                                                                                                                                                                                                                                              | Addressed on page number                          |
|-----------------------------------|---------|------------------------------------------------------------------------------------------------------------------------------------------------------------------------------------------------------------------------------------------------------------------------------------------|---------------------------------------------------|
| <b>Administrative information</b> |         |                                                                                                                                                                                                                                                                                          |                                                   |
| Title                             | 1       | Descriptive title identifying the study design, population, interventions, and, if applicable, trial acronym                                                                                                                                                                             | <u>  1  </u>                                      |
| Trial registration                | 2a      | Trial identifier and registry name. If not yet registered, name of intended registry                                                                                                                                                                                                     | <u>  2  </u>                                      |
|                                   | 2b      | All items from the World Health Organization Trial Registration Data Set                                                                                                                                                                                                                 | <u>throughout document and NCT trial registry</u> |
| Protocol version                  | 3       | Date and version identifier                                                                                                                                                                                                                                                              | <u>  1  </u>                                      |
| Funding                           | 4       | Sources and types of financial, material, and other support                                                                                                                                                                                                                              | <u> 19 </u>                                       |
| Roles and responsibilities        | 5a      | Names, affiliations, and roles of protocol contributors                                                                                                                                                                                                                                  | <u>  1  </u>                                      |
|                                   | 5b      | Name and contact information for the trial sponsor                                                                                                                                                                                                                                       | <u> 19 </u>                                       |
|                                   | 5c      | Role of study sponsor and funders, if any, in study design; collection, management, analysis, and interpretation of data; writing of the report; and the decision to submit the report for publication, including whether they will have ultimate authority over any of these activities | <u>None (see p. 21)</u>                           |

1 5d Composition, roles, and responsibilities of the coordinating centre, steering committee, endpoint  
 2 adjudication committee, data management team, and other individuals or groups overseeing the trial, if  
 3 applicable (see Item 21a for data monitoring committee)  N/A   
 4  
 5  
 6  
 7

## 9 Introduction

10  
 11 Background and 6a Description of research question and justification for undertaking the trial, including summary of relevant  3-5   
 12 rationale studies (published and unpublished) examining benefits and harms for each intervention  
 13  
 14 6b Explanation for choice of comparators  6   
 15  
 16 Objectives 7 Specific objectives or hypotheses  5-6   
 17  
 18 Trial design 8 Description of trial design including type of trial (eg, parallel group, crossover, factorial, single group),  
 19 allocation ratio, and framework (eg, superiority, equivalence, noninferiority, exploratory)  7-8   
 20  
 21

## 22 Methods: Participants, interventions, and outcomes

23  
 24 Study setting 9 Description of study settings (eg, community clinic, academic hospital) and list of countries where data will  6   
 25 be collected. Reference to where list of study sites can be obtained  
 26  
 27 Eligibility criteria 10 Inclusion and exclusion criteria for participants. If applicable, eligibility criteria for study centres and  8   
 28 individuals who will perform the interventions (eg, surgeons, psychotherapists)  
 29  
 30 Interventions 11a Interventions for each group with sufficient detail to allow replication, including how and when they will be  9-12   
 31 administered  
 32  
 33 11b Criteria for discontinuing or modifying allocated interventions for a given trial participant (eg, drug dose  16   
 34 change in response to harms, participant request, or improving/worsening disease)  
 35  
 36 11c Strategies to improve adherence to intervention protocols, and any procedures for monitoring adherence  12 (fidelity   
 37 (eg, drug tablet return, laboratory tests)  monitoring)   
 38  
 39 11d Relevant concomitant care and interventions that are permitted or prohibited during the trial  12 (usual care)   
 40  
 41  
 42

|    |                      |    |                                                                                                                                                                                                                                                                                                                                                                                |                       |
|----|----------------------|----|--------------------------------------------------------------------------------------------------------------------------------------------------------------------------------------------------------------------------------------------------------------------------------------------------------------------------------------------------------------------------------|-----------------------|
| 1  | Outcomes             | 12 | Primary, secondary, and other outcomes, including the specific measurement variable (eg, systolic blood pressure), analysis metric (eg, change from baseline, final value, time to event), method of aggregation (eg, median, proportion), and time point for each outcome. Explanation of the clinical relevance of chosen efficacy and harm outcomes is strongly recommended | <u>  6  </u>          |
| 2  |                      |    |                                                                                                                                                                                                                                                                                                                                                                                |                       |
| 3  |                      |    |                                                                                                                                                                                                                                                                                                                                                                                |                       |
| 4  |                      |    |                                                                                                                                                                                                                                                                                                                                                                                |                       |
| 5  |                      |    |                                                                                                                                                                                                                                                                                                                                                                                |                       |
| 6  | Participant timeline | 13 | Time schedule of enrolment, interventions (including any run-ins and washouts), assessments, and visits for participants. A schematic diagram is highly recommended (see Figure)                                                                                                                                                                                               | <u>Figure 1; p. 7</u> |
| 7  |                      |    |                                                                                                                                                                                                                                                                                                                                                                                |                       |
| 8  |                      |    |                                                                                                                                                                                                                                                                                                                                                                                |                       |
| 9  | Sample size          | 14 | Estimated number of participants needed to achieve study objectives and how it was determined, including clinical and statistical assumptions supporting any sample size calculations                                                                                                                                                                                          | <u> 14-15 </u>        |
| 10 |                      |    |                                                                                                                                                                                                                                                                                                                                                                                |                       |
| 11 |                      |    |                                                                                                                                                                                                                                                                                                                                                                                |                       |
| 12 |                      |    |                                                                                                                                                                                                                                                                                                                                                                                |                       |
| 13 | Recruitment          | 15 | Strategies for achieving adequate participant enrolment to reach target sample size                                                                                                                                                                                                                                                                                            | <u>  8  </u>          |
| 14 |                      |    |                                                                                                                                                                                                                                                                                                                                                                                |                       |

**Methods: Assignment of interventions (for controlled trials)**

Allocation:

|    |                                  |     |                                                                                                                                                                                                                                                                                                                                                          |                  |
|----|----------------------------------|-----|----------------------------------------------------------------------------------------------------------------------------------------------------------------------------------------------------------------------------------------------------------------------------------------------------------------------------------------------------------|------------------|
| 19 | Sequence generation              | 16a | Method of generating the allocation sequence (eg, computer-generated random numbers), and list of any factors for stratification. To reduce predictability of a random sequence, details of any planned restriction (eg, blocking) should be provided in a separate document that is unavailable to those who enrol participants or assign interventions | <u>  8  </u>     |
| 20 |                                  |     |                                                                                                                                                                                                                                                                                                                                                          |                  |
| 21 |                                  |     |                                                                                                                                                                                                                                                                                                                                                          |                  |
| 22 |                                  |     |                                                                                                                                                                                                                                                                                                                                                          |                  |
| 23 |                                  |     |                                                                                                                                                                                                                                                                                                                                                          |                  |
| 24 |                                  |     |                                                                                                                                                                                                                                                                                                                                                          |                  |
| 25 | Allocation concealment mechanism | 16b | Mechanism of implementing the allocation sequence (eg, central telephone; sequentially numbered, opaque, sealed envelopes), describing any steps to conceal the sequence until interventions are assigned                                                                                                                                                | <u> N/A (8) </u> |
| 26 |                                  |     |                                                                                                                                                                                                                                                                                                                                                          |                  |
| 27 |                                  |     |                                                                                                                                                                                                                                                                                                                                                          |                  |
| 28 |                                  |     |                                                                                                                                                                                                                                                                                                                                                          |                  |
| 29 | Implementation                   | 16c | Who will generate the allocation sequence, who will enrol participants, and who will assign participants to interventions                                                                                                                                                                                                                                | <u>  8  </u>     |
| 30 |                                  |     |                                                                                                                                                                                                                                                                                                                                                          |                  |
| 31 |                                  |     |                                                                                                                                                                                                                                                                                                                                                          |                  |
| 32 |                                  |     |                                                                                                                                                                                                                                                                                                                                                          |                  |
| 33 | Blinding (masking)               | 17a | Who will be blinded after assignment to interventions (eg, trial participants, care providers, outcome assessors, data analysts), and how                                                                                                                                                                                                                | <u> N/A (8) </u> |
| 34 |                                  |     |                                                                                                                                                                                                                                                                                                                                                          |                  |
| 35 |                                  |     |                                                                                                                                                                                                                                                                                                                                                          |                  |
| 36 |                                  | 17b | If blinded, circumstances under which unblinding is permissible, and procedure for revealing a participant's allocated intervention during the trial                                                                                                                                                                                                     | <u> N/A </u>     |
| 37 |                                  |     |                                                                                                                                                                                                                                                                                                                                                          |                  |
| 38 |                                  |     |                                                                                                                                                                                                                                                                                                                                                          |                  |
| 39 |                                  |     |                                                                                                                                                                                                                                                                                                                                                          |                  |
| 40 |                                  |     |                                                                                                                                                                                                                                                                                                                                                          |                  |
| 41 |                                  |     |                                                                                                                                                                                                                                                                                                                                                          |                  |
| 42 |                                  |     |                                                                                                                                                                                                                                                                                                                                                          |                  |

1  
2  
3 **Methods: Data collection, management, and analysis**  
4

|                        |     |                                                                                                               |             |
|------------------------|-----|---------------------------------------------------------------------------------------------------------------|-------------|
| 5 Data collection      | 18a | Plans for assessment and collection of outcome, baseline, and other trial data, including any related         | _12-14_____ |
| 6 methods              |     | processes to promote data quality (eg, duplicate measurements, training of assessors) and a description of    |             |
| 7                      |     | study instruments (eg, questionnaires, laboratory tests) along with their reliability and validity, if known. |             |
| 8                      |     | Reference to where data collection forms can be found, if not in the protocol                                 |             |
| 9                      |     |                                                                                                               |             |
| 10                     |     |                                                                                                               |             |
| 11                     | 18b | Plans to promote participant retention and complete follow-up, including list of any outcome data to be       | _12, 15__   |
| 12                     |     | collected for participants who discontinue or deviate from intervention protocols                             |             |
| 13                     |     |                                                                                                               |             |
| 14 Data management     | 19  | Plans for data entry, coding, security, and storage, including any related processes to promote data quality  | _13_____    |
| 15                     |     | (eg, double data entry; range checks for data values). Reference to where details of data management          |             |
| 16                     |     | procedures can be found, if not in the protocol                                                               |             |
| 17                     |     |                                                                                                               |             |
| 18                     |     |                                                                                                               |             |
| 19 Statistical methods | 20a | Statistical methods for analysing primary and secondary outcomes. Reference to where other details of the     | _15-16__    |
| 20                     |     | statistical analysis plan can be found, if not in the protocol                                                |             |
| 21                     |     |                                                                                                               |             |
| 22                     | 20b | Methods for any additional analyses (eg, subgroup and adjusted analyses)                                      | _15-16__    |
| 23                     |     |                                                                                                               |             |
| 24                     | 20c | Definition of analysis population relating to protocol non-adherence (eg, as randomised analysis), and any    |             |
| 25                     |     | statistical methods to handle missing data (eg, multiple imputation)                                          | _15_____    |
| 26                     |     |                                                                                                               |             |
| 27                     |     |                                                                                                               |             |

28 **Methods: Monitoring**  
29

|                    |     |                                                                                                              |          |
|--------------------|-----|--------------------------------------------------------------------------------------------------------------|----------|
| 30 Data monitoring | 21a | Composition of data monitoring committee (DMC); summary of its role and reporting structure; statement of    | _16_____ |
| 31                 |     | whether it is independent from the sponsor and competing interests; and reference to where further details   |          |
| 32                 |     | about its charter can be found, if not in the protocol. Alternatively, an explanation of why a DMC is not    |          |
| 33                 |     | needed                                                                                                       |          |
| 34                 |     |                                                                                                              |          |
| 35                 |     |                                                                                                              |          |
| 36                 | 21b | Description of any interim analyses and stopping guidelines, including who will have access to these interim | _16_____ |
| 37                 |     | results and make the final decision to terminate the trial                                                   |          |
| 38                 |     |                                                                                                              |          |
| 39 Harms           | 22  | Plans for collecting, assessing, reporting, and managing solicited and spontaneously reported adverse        | _16-17__ |
| 40                 |     | events and other unintended effects of trial interventions or trial conduct                                  |          |
| 41                 |     |                                                                                                              |          |
| 42                 |     |                                                                                                              |          |



|    |                                 |     |                                                                                                                                                                                                                                                                                     |             |
|----|---------------------------------|-----|-------------------------------------------------------------------------------------------------------------------------------------------------------------------------------------------------------------------------------------------------------------------------------------|-------------|
| 1  | Auditing                        | 23  | Frequency and procedures for auditing trial conduct, if any, and whether the process will be independent from investigators and the sponsor                                                                                                                                         | ___ N/A ___ |
| 2  |                                 |     |                                                                                                                                                                                                                                                                                     |             |
| 3  |                                 |     |                                                                                                                                                                                                                                                                                     |             |
| 4  | <b>Ethics and dissemination</b> |     |                                                                                                                                                                                                                                                                                     |             |
| 5  |                                 |     |                                                                                                                                                                                                                                                                                     |             |
| 6  | Research ethics approval        | 24  | Plans for seeking research ethics committee/institutional review board (REC/IRB) approval                                                                                                                                                                                           | ___ 17 ___  |
| 7  |                                 |     |                                                                                                                                                                                                                                                                                     |             |
| 8  |                                 |     |                                                                                                                                                                                                                                                                                     |             |
| 9  | Protocol amendments             | 25  | Plans for communicating important protocol modifications (eg, changes to eligibility criteria, outcomes, analyses) to relevant parties (eg, investigators, REC/IRBs, trial participants, trial registries, journals, regulators)                                                    | ___ 17 ___  |
| 10 |                                 |     |                                                                                                                                                                                                                                                                                     |             |
| 11 |                                 |     |                                                                                                                                                                                                                                                                                     |             |
| 12 |                                 |     |                                                                                                                                                                                                                                                                                     |             |
| 13 |                                 |     |                                                                                                                                                                                                                                                                                     |             |
| 14 | Consent or assent               | 26a | Who will obtain informed consent or assent from potential trial participants or authorised surrogates, and how (see Item 32)                                                                                                                                                        | ___ 17 ___  |
| 15 |                                 |     |                                                                                                                                                                                                                                                                                     |             |
| 16 |                                 |     |                                                                                                                                                                                                                                                                                     |             |
| 17 |                                 | 26b | Additional consent provisions for collection and use of participant data and biological specimens in ancillary studies, if applicable                                                                                                                                               | ___ N/A ___ |
| 18 |                                 |     |                                                                                                                                                                                                                                                                                     |             |
| 19 |                                 |     |                                                                                                                                                                                                                                                                                     |             |
| 20 | Confidentiality                 | 27  | How personal information about potential and enrolled participants will be collected, shared, and maintained in order to protect confidentiality before, during, and after the trial                                                                                                | ___ 17 ___  |
| 21 |                                 |     |                                                                                                                                                                                                                                                                                     |             |
| 22 |                                 |     |                                                                                                                                                                                                                                                                                     |             |
| 23 |                                 |     |                                                                                                                                                                                                                                                                                     |             |
| 24 | Declaration of interests        | 28  | Financial and other competing interests for principal investigators for the overall trial and each study site                                                                                                                                                                       | ___ 19 ___  |
| 25 |                                 |     |                                                                                                                                                                                                                                                                                     |             |
| 26 |                                 |     |                                                                                                                                                                                                                                                                                     |             |
| 27 | Access to data                  | 29  | Statement of who will have access to the final trial dataset, and disclosure of contractual agreements that limit such access for investigators                                                                                                                                     | ___ 17 ___  |
| 28 |                                 |     |                                                                                                                                                                                                                                                                                     |             |
| 29 |                                 |     |                                                                                                                                                                                                                                                                                     |             |
| 30 | Ancillary and post-trial care   | 30  | Provisions, if any, for ancillary and post-trial care, and for compensation to those who suffer harm from trial participation                                                                                                                                                       | ___ N/A ___ |
| 31 |                                 |     |                                                                                                                                                                                                                                                                                     |             |
| 32 |                                 |     |                                                                                                                                                                                                                                                                                     |             |
| 33 | Dissemination policy            | 31a | Plans for investigators and sponsor to communicate trial results to participants, healthcare professionals, the public, and other relevant groups (eg, via publication, reporting in results databases, or other data sharing arrangements), including any publication restrictions | ___ 17 ___  |
| 34 |                                 |     |                                                                                                                                                                                                                                                                                     |             |
| 35 |                                 |     |                                                                                                                                                                                                                                                                                     |             |
| 36 |                                 |     |                                                                                                                                                                                                                                                                                     |             |
| 37 |                                 |     |                                                                                                                                                                                                                                                                                     |             |
| 38 |                                 | 31b | Authorship eligibility guidelines and any intended use of professional writers                                                                                                                                                                                                      | ___ 19 ___  |
| 39 |                                 |     |                                                                                                                                                                                                                                                                                     |             |
| 40 |                                 | 31c | Plans, if any, for granting public access to the full protocol, participant-level dataset, and statistical code                                                                                                                                                                     | ___ N/A ___ |
| 41 |                                 |     |                                                                                                                                                                                                                                                                                     |             |
| 42 |                                 |     |                                                                                                                                                                                                                                                                                     |             |
| 43 |                                 |     |                                                                                                                                                                                                                                                                                     |             |
| 44 |                                 |     |                                                                                                                                                                                                                                                                                     |             |
| 45 |                                 |     |                                                                                                                                                                                                                                                                                     |             |
| 46 |                                 |     |                                                                                                                                                                                                                                                                                     |             |

1 **Appendices**

2

3 Informed consent 32 Model consent form and other related documentation given to participants and authorised surrogates Supplementary File

4 materials

5

6 Biological 33 Plans for collection, laboratory evaluation, and storage of biological specimens for genetic or molecular \_\_N/A\_\_

7 specimens analysis in the current trial and for future use in ancillary studies, if applicable

8

---

9

10 \*It is strongly recommended that this checklist be read in conjunction with the SPIRIT 2013 Explanation & Elaboration for important clarification on the items.

11 Amendments to the protocol should be tracked and dated. The SPIRIT checklist is copyrighted by the SPIRIT Group under the Creative Commons

12 [“Attribution-NonCommercial-NoDerivs 3.0 Unported”](#) license.

13

14

15

16

17

18

19

20

21

22

23

24

25

26

27

28

29

30

31

32

33

34

35

36

37

38

39

40

41

42

43

44

45

46

# BMJ Open

## Adapting the Diabetes Prevention Program for low and middle-income countries: Protocol for a cluster randomized trial to evaluate "Lifestyle Africa"

|                                 |                                                                                                                                                                                                                                                                                                                                                                                                                                                                                                                                                                                                                                                                                                                                                                                                                                                                                                                                                                                                                                                                                                                                                                                                                                 |
|---------------------------------|---------------------------------------------------------------------------------------------------------------------------------------------------------------------------------------------------------------------------------------------------------------------------------------------------------------------------------------------------------------------------------------------------------------------------------------------------------------------------------------------------------------------------------------------------------------------------------------------------------------------------------------------------------------------------------------------------------------------------------------------------------------------------------------------------------------------------------------------------------------------------------------------------------------------------------------------------------------------------------------------------------------------------------------------------------------------------------------------------------------------------------------------------------------------------------------------------------------------------------|
| Journal:                        | <i>BMJ Open</i>                                                                                                                                                                                                                                                                                                                                                                                                                                                                                                                                                                                                                                                                                                                                                                                                                                                                                                                                                                                                                                                                                                                                                                                                                 |
| Manuscript ID                   | bmjopen-2019-031400.R1                                                                                                                                                                                                                                                                                                                                                                                                                                                                                                                                                                                                                                                                                                                                                                                                                                                                                                                                                                                                                                                                                                                                                                                                          |
| Article Type:                   | Protocol                                                                                                                                                                                                                                                                                                                                                                                                                                                                                                                                                                                                                                                                                                                                                                                                                                                                                                                                                                                                                                                                                                                                                                                                                        |
| Date Submitted by the Author:   | 15-Aug-2019                                                                                                                                                                                                                                                                                                                                                                                                                                                                                                                                                                                                                                                                                                                                                                                                                                                                                                                                                                                                                                                                                                                                                                                                                     |
| Complete List of Authors:       | Catley, Delwyn; Children's Mercy Hospitals and Clinics, Center for Children's Healthy Lifestyles & Nutrition; University of Missouri Kansas City School of Medicine<br>Puoane, Thandi; University of Western Cape, School of Public Health<br>Tsolekile, Lungiswa; University of Western Cape, School of Public Health<br>Resnicow, Ken; University of Michigan School of Public Health<br>Fleming, Kandace; University of Kansas, Life Span Institute<br>Hurley, Emily; Children's Mercy Hospitals and Clinics, Health Services and Outcomes<br>Smyth, Joshua; Penn State College of Health and Human Development<br>Vitolins, Mara; Wake Forest University School of Medicine, Department of Epidemiology & Prevention<br>Lambert, Estelle; University of Cape Town, UCT Research Centre for Health through Physical Activity, Lifestyle and Sport (HPALS), Division of Research Unit for Exercise Science and Sports Medicine, Faculty of Health Sciences<br>Levitt, Naomi; University of Cape Town, Department of Medicine and Chronic Disease Initiative for Africa<br>Goggin, Kathy; Children's Mercy Hospitals and Clinics, Health Services and Outcomes Research; University of Missouri Kansas City School of Medicine |
| <b>Primary Subject Heading</b>: | Global health                                                                                                                                                                                                                                                                                                                                                                                                                                                                                                                                                                                                                                                                                                                                                                                                                                                                                                                                                                                                                                                                                                                                                                                                                   |
| Secondary Subject Heading:      | Evidence based practice, Health services research, Diabetes and endocrinology, Public health                                                                                                                                                                                                                                                                                                                                                                                                                                                                                                                                                                                                                                                                                                                                                                                                                                                                                                                                                                                                                                                                                                                                    |
| Keywords:                       | obesity, diabetes prevention program, low and middle-income countries, community health workers                                                                                                                                                                                                                                                                                                                                                                                                                                                                                                                                                                                                                                                                                                                                                                                                                                                                                                                                                                                                                                                                                                                                 |
|                                 |                                                                                                                                                                                                                                                                                                                                                                                                                                                                                                                                                                                                                                                                                                                                                                                                                                                                                                                                                                                                                                                                                                                                                                                                                                 |

SCHOLARONE™  
Manuscripts

1  
2  
3  
4  
5  
6  
7  
8  
9  
10  
11  
12  
13  
14  
15  
16  
17  
18  
19  
20  
21  
22  
23  
24  
25  
26  
27  
28  
29  
30  
31  
32  
33  
34  
35  
36  
37  
38  
39  
40  
41  
42  
43  
44  
45  
46  
47  
48  
49  
50  
51  
52  
53  
54  
55  
56  
57  
58  
59  
60

## Adapting the Diabetes Prevention Program for low and middle-income countries: Protocol for a cluster randomized trial to evaluate “Lifestyle Africa”

Delwyn Catley<sup>1,2</sup>, Thandi Puoane<sup>3</sup>, Lungiswa Tsolekile<sup>3</sup>, Ken Resnicow<sup>4</sup>, Kandace K. Fleming<sup>5</sup>, Emily A. Hurley<sup>6</sup>, Joshua M. Smyth<sup>7</sup>, Mara Z. Vitolins<sup>8</sup>, Estelle V. Lambert<sup>9</sup>, Naomi S. Levitt<sup>10</sup>, & Kathy Goggin<sup>2,6,11</sup>

<sup>1</sup>Center for Children's Healthy Lifestyles and Nutrition, Children's Mercy Kansas City, Kansas City, MO, United States

<sup>2</sup>University of Missouri – Kansas City School of Medicine, Kansas City, MO, United States

<sup>3</sup>University of the Western Cape School of Public Health, Cape Town, South Africa

<sup>4</sup>University of Michigan School of Public Health, Ann Arbor, MI, United States

<sup>5</sup>University of Kansas, Lawrence, KS, United States

<sup>6</sup>Health Services and Outcomes Research, Children's Mercy Hospitals and Clinics, Kansas City, MO, United States

<sup>7</sup>College of Health and Human Development, Penn State University, Hershey, PA, United States

<sup>8</sup>Department of Epidemiology & Prevention,

<sup>9</sup>UCT Research Centre for Health through Physical Activity, Lifestyle and Sport (HPALS), Division of Research Unit for Exercise Science and Sports Medicine, Faculty of Health Sciences, University of Cape Town, Cape Town, South Africa

<sup>10</sup> Department of Medicine and Chronic Disease Initiative for Africa, Faculty of Health Sciences, University of Cape Town, Cape Town, South Africa

<sup>11</sup>University of Missouri – Kansas City School of Pharmacy, Kansas City, MO, United States

**§Corresponding Author:** Delwyn Catley, Children's Mercy Kansas City and University of Missouri - Kansas City, 2401 Gillham Road, Kansas City, MO 64108, +1 816 302-0232, dcatley@cmh.edu

Submitted August 14, 2019 (Version 3)

## Abstract

**Introduction:** Low and middle-income countries like South Africa are experiencing major increases in burden of non-communicable diseases such as diabetes and cardiovascular conditions. However, evidence-based interventions to address behavioral factors related to these diseases are lacking. Our study aims to adapt the CDC's National Diabetes Prevention Program (DPP) within the context of an under-resourced urban community in Cape Town, South Africa.

**Methods/analysis:** The new intervention (*Lifestyle Africa*) consists of 17 weekly sessions delivered by trained community health workers (CHW). In addition to educational and cultural adaptations of DPP content, the program adds novel components of text messaging and CHW training in motivational interviewing. We will recruit overweight and obese participants ( $\text{BMI} \geq 25 \text{ kg/m}^2$ ) who are members of 28 existing community health clubs served by CHWs. In a two-year cluster randomized control trial, clubs will be randomly allocated to receive the intervention or usual care. After Year 1, usual care participants will also receive the intervention and both groups will be followed for another year. The primary outcome analysis will compare percentage of baseline weight loss at Year 1. Secondary outcomes will include diabetes and cardiovascular risk indicators (blood pressure, hemoglobin A1C, lipids), changes in self-reported medication use, diet (fat and fruit and vegetable intake), physical activity, and health-related quality of life. We will also assess potential psychosocial mediators/moderators as well as cost-effectiveness of the program.

**Ethics/dissemination:** Ethical approval was obtained from the University of Cape Town and Children's Mercy. Results will be submitted for publication in peer-reviewed journals and training curricula will be disseminated to local stakeholders.

**Trial registration:** NCT03342274; Pre-results

## Strengths and Limitations

- Community-engaged development ensures the intervention fits the cultural context and existing models of care.
- Broad participant inclusion criteria will help produce relevant, more generalizable findings.
- Cluster-randomized design will lead to a rigorous evaluation of the intervention.
- Biometric and biologic measures are rigorous outcome indicators.
- Low resource environment will make delivering the intervention reliably and with fidelity challenging.

## Introduction

The World Health Organization estimates that of the 56.4 million global deaths in 2015, almost 40 million (70%) were due to non-communicable diseases (NCDs)[1]. The leading causes were cardiovascular diseases (CVD) with a substantial number also coming from diabetes mellitus (DM). Over three-quarters of deaths attributed to NCDs in 2015 occurred in low and middle-income countries, where the disproportionate burden of NCDs is expected to continue to increase [1,2].

As a result of globalization and economic advancement, countries like South Africa are experiencing an “epidemiological transition” in which disease prevalence is shifting from primarily infectious disease and under-nutrition to primarily non-communicable diseases and over-nutrition [2]. These trends have been attributed to rising incomes and urbanization in low and middle-income countries which leads to a shift from eating unrefined carbohydrates to a greater intake of fats, sweeteners and animal source foods, as well as highly-processed foods, sometimes referred to as a “nutrition transition”[3,4]. The negative effects of this dietary change are compounded by reductions in physical activity, which are associated with urban lifestyles [5]. Contributing factors include the limited availability of affordable, healthy food in poorer areas, combined with the increased availability of fast foods and cheap snacks that are high in fats and sugar [6], sedentary employment [4,5], limited outdoor space and high rates of street violence [7–9]. Cultural beliefs and practices may also contribute. For example, obesity is less stigmatized, and even valued, in many African cultures because it is associated with dignity, wealth, and being treated well by one’s husband; whereas weight loss is regarded as a source of stigma and a sign of disease, in particular of HIV/AIDS [10].

Although signs of epidemiological transition have been observed in many low and middle income countries, studies suggest that the speed at which this transition appears to be occurring in South Africa is particularly striking [8,11–16]. Fifty-four percent of South African adults are overweight and 28.3% are obese—a statistic that has risen from 17.6% in 1996 and 22.9% in 2006 [17]. South African women have the highest prevalence of obesity in sub-Saharan Africa at 40% [18]. Furthermore, hypertension affects

1  
2  
3 46% of women and 44% of men nationally [19].  
4

5         Considering the public health and economic impacts of NCDs, national and provincial health  
6 departments in South Africa have declared promotion of healthy lifestyles a public health priority [20].  
7  
8 Despite the need for effective and affordable interventions for combating DM and CVD, there is a dearth  
9 of research devoted to developing and evaluating NCD interventions in low and middle income settings,  
10 particularly in Africa. Globally, one of the most notable examples of effective interventions based on  
11 lifestyle change is the Diabetes Prevention Program (DPP) which the Centers for Disease Control has  
12 adopted and disseminated in the United States as the National DPP [21]. Through 16 core sessions  
13 delivered by “lifestyle coaches”, the original DPP aimed for its participants to engage in at least 150  
14 minutes of moderate physical activity per week and to reduce initial body weight by 7% over 6 months.  
15 Its original randomized control trial (RCT) among individuals with impaired glucose tolerance reported a  
16 58% reduction in DM incidence [22]. A more recent RCT examining long-term effects of a group-based  
17 version of the DPP among 5,000 overweight and obese individuals with Type-2 DM (the Look AHEAD  
18 trial) showed an average loss of 8.6% of initial body weight in the lifestyle intervention group (compared  
19 to 0.7% for controls) and 4.7% at the 4-year follow-up [23–25]. In addition, there were significant  
20 improvements in glucose control as well as reductions in blood pressure, triglycerides, HDL cholesterol  
21 and medication use.  
22  
23  
24  
25  
26  
27  
28  
29  
30  
31  
32  
33  
34  
35  
36  
37  
38

39         With evidence of its effectiveness among adults with pre-diabetes as well as adults with diabetes,  
40 the DPP has also been adapted for several real-world settings within the U.S. including YMCAs [26,27],  
41 African American Churches [28], community hospitals [29], community health-care facilities [30], as  
42 well as through online social networks and mobile phone platforms [31]. Adaptions of the DPP designed  
43 to be delivered by lay community health workers (CHWs) have also been successful [32,33]—some  
44 achieving weight loss in the range of 6-7% [27,33], comparable to the 8.6% observed in the original trial  
45 [23] and consistent with recommended weight loss goals for diabetes risk reduction [34].  
46  
47  
48  
49  
50  
51  
52

53         Although the DPP has been shown to have strong outcomes when adapted for community settings  
54 in the U.S., this adaptation has not yet been extended to low and middle-income settings. For example,  
55  
56  
57  
58  
59

1  
2  
3 the mode of delivery in the United States has been through trained health or allied health professionals  
4 with post-graduate training and backgrounds in nutrition or behavior change [22]. This is not feasible in  
5 most low-resource environments due to costs and/or the lack of trained public-health professionals.  
6  
7 Delivering services at medical facilities may also hinder attendance because of the time loss and cost of  
8  
9 local travel. Furthermore, the content of sessions also needs to be adapted to be suitable for the prevailing  
10  
11 literacy and numeracy levels of both providers and recipients of the program, and to take into account the  
12  
13 unique food preferences, cooking and shopping patterns of the region. Cultural norms that affect food  
14  
15 preferences or attitudes about body weight or weight loss, as well as environmental barriers that affect  
16  
17 access to food or ability to exercise, need to be addressed. For example, many individuals in South Africa  
18  
19 live in crowded informal (shack) settlements that may lack reliable electricity, space, access to affordable  
20  
21 produce, cold storage of fresh food, and places that are safe to exercise. In addition to barriers, there may  
22  
23 be unique facilitators that can support intervention delivery in low and middle-income countries. For  
24  
25 example, many countries provide community-based care using CHWs offering opportunities to tap  
26  
27 existing social support networks and a community-based health infrastructure [35]. Also, cell phone use is  
28  
29 high offering the opportunity to deliver supportive text messages which have been shown to enhance the  
30  
31 effectiveness of behavior change interventions [36,37].  
32  
33  
34  
35  
36

37 The purpose of our study is to use a community-engaged adaption process to develop and test a  
38  
39 new version of the DPP (“*Lifestyle Africa*”) tailored to overweight and obese adults in low-income, urban  
40  
41 areas of sub-Saharan Africa. The key adaption is to design the program so that it can be delivered by  
42  
43 CHWs. In South Africa CHWs are typically drawn from the local community and have similar levels of  
44  
45 education as the target population. Evaluation of Lifestyle Africa is based on a community-based cluster  
46  
47 randomized controlled trial (RCT) conducted in partnership with two NGOs that provide chronic disease  
48  
49 care to individuals with DM and/or CVD using CHWs. CHWs are used to provide medication delivery  
50  
51 and health monitoring to individuals who are members of “support groups” or “health clubs”. Care is  
52  
53 provided from approximately February through November each calendar year due to the year-end holiday  
54  
55 season during which most community members travel to their rural homes for an extended period. CHWs  
56  
57  
58  
59  
60



1  
2  
3 and their associated support groups are randomized to receive *Lifestyle Africa* or to serve as a treatment-  
4 as-usual control. The primary outcome analysis will compare percentage weight loss from baseline to  
5 follow-up at the end of the year between *Lifestyle Africa* and usual care participants. Secondary outcomes  
6 are DM and cardiovascular risk indicators (blood pressure, hemoglobin A1C, lipids), changes in  
7 medication use, diet (fat, fruit and vegetable intake), physical activity, and health related quality of life  
8 (HRQOL).  
9  
10  
11  
12  
13  
14

## 15 **Methods and Analysis**

### 16 **Setting:**

17  
18  
19  
20 This study is being conducted in the area of Khayelitsha, a fast-growing urban township of Cape Town,  
21 South Africa. Khayelitsha residents are 99% Black African and 97% Xhosa speaking [38]. Poverty is  
22 extremely high, with 38% of individuals unemployed and 89% earning less than R6,400 (approximately  
23 475 USD) per month. More than half of the residents are rural to urban migrants and 64% of adults have  
24 not completed high school [38]. There is a high prevalence of overweight and obesity [39] and prevalence  
25 of DM among Black Africans is approximately 13%, having increased more than 50% over 20 years [40].  
26  
27  
28  
29  
30  
31  
32  
33  
34  
35  
36

### 37 **Patient and Public Involvement:**

#### 38 *Community Partners*

39  
40 Project implementation is conducted in partnership with two well-established NGOs that use CHWs from  
41 the community to support the health of over 9,000 individuals in Khayelitsha and surrounding  
42 communities. Our intervention is delivered through adaptation of the NGO's existing programs that use  
43 CHWs to provide health-related services to small community groups or "clubs" of approximately 10-50  
44 individuals who meet in homes or community facilities. CHWs provide such services as health  
45 monitoring, medication delivery, education, physical activity, meals, wellness programming, and income  
46 generating activities. NGOs work collaboratively with local health clinics to both refer patients and  
47 receive referrals of patients many of whom have diabetes and cardiovascular disease. CHWs meet  
48  
49  
50  
51  
52  
53  
54  
55  
56  
57  
58  
59  
60

1  
2  
3 regularly (varying by NGO and club from daily to monthly) with their designated groups. Many groups  
4 also function independently providing meals and social activities to members on a regular basis.  
5

### 6 *Involvement in study design*

7  
8  
9 Our team's preliminary work involved extensive formative research with club members, CHWs  
10 and community leaders to better understand cultural norms, barriers and facilitators surrounding physical  
11 activity, diet and body image [10]. In partnership with CHWs, a training manual and pilot program was  
12 developed, which demonstrated the feasibility of using health clubs to encourage walking [41]. Additional  
13 pilot work included development and evaluation of three intervention sessions based on the DPP. Two  
14 pairs of CHWs were trained to deliver three DPP pilot sessions to participants, and both CHW and  
15 participant feedback were incorporated into the development of the complete program. To develop the  
16 complete *Lifestyle Africa* program for the present study, we formed two community advisory boards  
17 (CABs) in two Khayelitsha area neighborhoods to guide the development of a culturally appropriate and  
18 sustainable program. Members included a number of CHWs, community residents with DM and/or CVD,  
19 local experts in DM and CVD, and community leaders capable of guiding and supporting dissemination  
20 (e.g., a neighborhood elder and a representative of the provincial Department of Health). The CABs  
21 provide input and assistance with all aspects of the project including naming the intervention program,  
22 assisting with program development, reviewing intervention content and materials, and providing input  
23 on program logistics. Members attend quarterly meetings as well as participate in work groups focused on  
24 specific tasks (e.g., adapting the DPP manual, reviewing or trying out suggested adaptations of the DPP,  
25 or reviewing text messages).  
26  
27  
28  
29  
30  
31  
32  
33  
34  
35  
36  
37  
38  
39  
40  
41  
42  
43  
44  
45  
46

### 47 **Trial Design:**

48  
49 This is a 2-arm parallel group cluster RCT with balanced randomization (1:1) and a cross-over of  
50 the control arm after the main outcome assessment (Figure 1). CHWs mostly work individually or in pairs  
51 with a particular group, but in some cases CHWs work as trios or work with more than one group. For  
52 this reason, the unit of randomization is CHW "team" (individual, pair or trio). CHW teams randomized  
53  
54  
55  
56  
57  
58  
59  
60

1  
2  
3 to intervention receive training and provide the intervention to their support groups. CHW teams  
4  
5 randomized to control provide treatment as usual to their support groups. After approximately one year of  
6  
7 intervention, control CHW teams are also trained in the intervention and their support groups are crossed  
8  
9 over to the intervention arm. Participants in both arms are assessed at the end of the first and second year.  
10  
11

### 12 13 **Participants/Recruitment:**

14  
15 To recruit participants, two initial sessions were developed to introduce and explain the purpose  
16  
17 and nature of the *Lifestyle Africa* program. CHWs are trained to deliver these sessions which follow a  
18  
19 similar format to the main *Lifestyle Africa* sessions. At the introductory sessions, interested club members  
20  
21 are invited to return for an eligibility screening and enrollment session. To serve our NGO partners and to  
22  
23 be sensitive to community wishes, our goal is to invite all eligible members of 28 clubs (~18 members  
24  
25 each) served by our partner NGOs to participate in the intervention and to enroll as many as feasible in  
26  
27 the study. The eligibility criteria were therefore designed to be as inclusive of club members as possible.  
28  
29 The inclusion criterion for support group members is being overweight or obese (BMI  $\geq 25$  kg/m<sup>2</sup>).  
30  
31 Exclusion criteria are: (1) having an unsafe level of blood pressure [ $>160$  (systolic) and/or  $>100$  mm  
32  
33 (diastolic)] [42], (2) elevated blood sugar [HbA1C  $> 11$ ] [42] (3) being pregnant, breast-feeding or  
34  
35 planning pregnancy within two years; (4) chronic use of oral steroid medication (which may affect weight  
36  
37 loss); and (5) not intending to stay in the group over the next two years.  
38  
39  
40  
41  
42

### 43 **Randomization:**

44  
45 Randomization of support groups was conducted by the project statistician using a numbered list of  
46  
47 the CHW teams and their associated groups. CHW teams are stratified within NGO. A computerized  
48  
49 random number generator was used to create the allocation scheme. CHW groups have been randomized  
50  
51 prior to enrollment of participants and launch of the intervention in order to know which CHWs need to  
52  
53 be ready to deliver the intervention. It is therefore not feasible to blind CHWs or participants.  
54  
55  
56  
57  
58  
59  
60

**Interventions:***(1) Lifestyle Africa*

Adaptation of the DPP: In developing *Lifestyle Africa*, we aimed to retain key elements from the CDC National DPP [22,43] while making necessary cultural, educational, and language adaptations relevant to the community. CDC's National DPP consists of 16 "core" sessions delivered over 6 months and 15 "post-core" sessions focused on maintaining participants' engagement in the program. Participants are encouraged to lose 7% of body weight and exercise 150 mins/ week. Central components of the program include self-monitoring of caloric intake and physical activity along with other social-cognitive and problem-solving theory elements [43].

The primary adaptation was to eliminate the need for a high-level health professional (such a nutritionist or dietitian) to deliver the core sessions of the program by providing session content on video (Katula et al., 2011). With expert content provided via video the role of CHWs is to show the video, serve as group facilitator, and ensure engagement with the video material. Videos were developed in Xhosa and use a presenter/narrator in conjunction with photos and animation. Frequent pauses are built into the video session during which CHWs prompt participants with interactive questions and activities such as completing worksheets that reinforce and personalize video content. Activities are designed to minimize writing and allow for participants to engage orally if needed (e.g., through discussion with a partner.) Participants receive a program book in Xhosa (or English if preferred) with educationally and culturally adapted handouts and forms needed for each session (e.g., physical activity tracking sheets, goal setting forms). The visual elements of the video were designed to be culturally sensitive, for example by depicting the individuals and scenes representative of the target community. To aid CHWs, each video has an accompanying session guide that provides step-by-step guidance on materials, procedures and the verbal prompts and questions needed to facilitate the session. To avoid excessive session length the *Lifestyle Africa* program consists of 17 rather than 16 core sessions.

1  
2  
3 Other key adaptations included those made because, unlike the original DPP, participants in  
4 *Lifestyle Africa* are not actively seeking treatment in the form of lifestyle behavior change. Therefore, in  
5 addition to the 17 core sessions, we created two additional “recruitment sessions” that follow the same  
6 format (i.e., video delivered with pauses for discussion) to provide information on the rationale for  
7 participating in a diet and exercise program. To account for participants’ levels of health literacy and  
8 numeracy we expanded educational content (e.g., explained the physiology of diabetes and cardiovascular  
9 disease; explained the meaning of a kilojoule), simplified explanations, reduced calculations, and  
10 “chunked” information by interspersing it with discussion and related activities. We also bolstered  
11 motivational aspects of the DPP through the addition of elements of Motivational Interviewing a method  
12 of counseling designed to strengthen motivation by fostering participant’s own reasons for change (e.g.,  
13 exploring personal values, asking participants to express their own reasons for change). According to  
14 Motivational Interviewing principles the counselor’s style or manner of counseling is also important (e.g.,  
15 person-centered and autonomy supportive rather than directive or persuasive; use of reflective listening  
16 rather and open questions rather than closed questions and confrontation). For this reason a Motivational  
17 Interviewing and group facilitation skills training curriculum was also developed for CHWs to provide the  
18 skills necessary for delivering the sessions in a Motivational Interviewing consistent manner[44].

19  
20 A final adaptation capitalizes on the widespread use of cell phones in the developing world and  
21 increasing evidence of the potential benefit of text messaging to help promote behavior change [37]. A  
22 empirically based text message system was developed in which participants are provided with two  
23 messages per day (morning and lunch time) to provide reminders, foster motivation and self-efficacy,  
24 affirm ongoing efforts, and help with implementation planning (i.e., behavior change tips). The same  
25 messages are delivered to all participants, but weekly message content refers to each of the core sessions  
26 and is timed to match the participant’s session progress.

27  
28 In addition to the video-based core sessions 12 post-core sessions were developed. These are  
29 reduced in length but follow the same format (weigh-in, review and discussion of progress toward goal(s))

1  
2  
3 from the prior session, delivery and discussion of new content, goal setting for the next session). New  
4 content is brief and delivered by the CHW using scripted language and straightforward handouts.  
5  
6

7 CHW training: CHWs working for our partner NGOs are not required to have any specific  
8 educational background but must have basic reading, writing, and arithmetic skills sufficient to maintain  
9 attendance registers, medication logs, and assess and record weight, height etc. CHWs also have received  
10 basic training as part of their employment as CHWs (e.g., in home-based care, chronic disease  
11 management, and wellness). Training for *Lifestyle Africa* facilitators consists of 3 days of didactic training  
12 and 8 weekly half day sessions of experiential training as mock *Lifestyle Africa* participants conducted in  
13 Xhosa by local research team members. Didactic training includes basic training in diabetes and diabetes  
14 management, behavior change principles, Motivational Interviewing, and group facilitation. CHWs are  
15 also trained in use of the video projectors, and logistical and study-related safety procedures. Content of  
16 Motivational Interview training was also adapted to limit jargon, and to adapt concepts and experiential  
17 learning activities to CHW cultural values, language and educational level. For example, “MI Spirit” was  
18 distilled as “What is effective counseling?” and focused on the need to listen and reflect before giving  
19 advice. Experiential training involved CHWs discussing their own experiences with making behavior  
20 change. “Evocation and eliciting change talk” was described in terms of “building motivation or ‘a strong  
21 why’”. Experiential training involved exploring goals and values related to behavior change. Content was  
22 adapted to be culturally relevant (e.g., use of culturally relevant values such as “at peace with ancestors”).  
23  
24 With regard to MI core skills, training and practice emphasized the use of open-ended questions and  
25 reflections.  
26  
27  
28  
29  
30  
31  
32  
33  
34  
35  
36  
37  
38  
39  
40  
41  
42  
43  
44

45 CHW’s reviewed and practiced key activities after each session (e.g., conduct weigh in, conduct  
46 opening facilitation, provide feedback on food logs) during their training as mock *Lifestyle Africa*  
47 participants. In subsequent mock sessions (where these activities were repeated) they were asked on a  
48 rotational basis to act as facilitators (e.g., lead the opening facilitation, facilitate goal-setting and action  
49 planning). A checklist was used to confirm all CHW’s had satisfactorily conducted all key elements of the  
50 program.  
51  
52  
53  
54  
55  
56  
57  
58  
59  
60

1  
2  
3 Delivery: To avoid disruption of the study during the year-end holiday season that is widely  
4 observed in the community, enrollment takes place in February and March following the break and  
5 intervention begins immediately after each club is enrolled. Control group clubs begin the intervention  
6 one year after the intervention arm begins. CHWs are asked to deliver the program weekly (or biweekly if  
7 needed to fit the schedule of the group) but adjustments are made to allow for days when club members  
8 do not meet (e.g., on days when many members collect pension payments or days of neighborhood  
9 disruptions due to protests etc.). Session attendance, weight, and activity minutes are tracked by CHWs  
10 using standardized forms. After clubs complete the 17 core sessions they continue with monthly sessions  
11 until the final assessment.  
12  
13  
14  
15  
16  
17  
18  
19  
20  
21

22 Fidelity Monitoring: Research staff will observe at least the first ten sessions for each CHW team  
23 and taper observations over time to at least one session every 5-8 weeks. Checklists are used to verify  
24 adherence to key session protocol elements (e.g., completed weigh in, followed verbal prompts, used  
25 projector correctly etc.). Adherence to MI principles and group facilitation behaviors are evaluated using  
26 rating scales (poor/never to excellent/always) adapted from the OnePass measure for MI competence [45].  
27  
28  
29  
30  
31  
32  
33  
34

### 35 (2) *Usual care (wait list)*

36  
37 For clubs randomized to usual care, CHWs continue to lead clubs in their usual activities (e.g.,  
38 approximately monthly monitoring of weight, blood pressure and blood glucose, delivery of medication).  
39 Although usual care may include education and health monitoring, there is no systematic, structured  
40 means by which lifestyle change is facilitated on an ongoing basis.  
41  
42  
43  
44  
45  
46  
47

### 48 **Data Collection:**

49 Clubs are enrolled in two waves separated by 12 months. Each wave follows the same procedure  
50 for enrollment and assessment (see Figure 1). Recruitment and enrollment of each wave takes  
51 approximately two months over February and March of the calendar year. Enrollment for wave 1 began in  
52 February of 2018. The baseline assessment is conducted at enrollment. Follow-up assessments occur at  
53  
54  
55  
56  
57  
58  
59  
60



1  
2  
3 the end of the enrollment year (approximately 8 months after enrollment) and the end of the second year  
4 (approximately 20 months after enrollment). Although the goal was to conduct assessments 12 and 24  
5 months after enrollment, the timing of the enrollment and follow-up assessments had to be adjusted to  
6 avoid the December-January holiday season break when the most participants leave their neighborhoods  
7 to return to their rural homes. To minimize attrition and interference in program participation due to  
8 holiday travel, we therefore enroll participants and begin the program as early as possible in the calendar  
9 year (immediately after participants return from their holiday break) and conduct our year 1 follow-up  
10 assessment as late as possible in the calendar year (just before participants leave for their holiday break).  
11 For similar reasons the year 2 assessment is conducted 12 months after the year 1 assessment, just before  
12 participants leave for their holiday break.  
13  
14  
15  
16  
17  
18  
19  
20  
21  
22  
23

24 The follow-up assessment at the end of Year 1 is the main outcome time point. The follow-up  
25 assessment at the end of Year 2 is used to evaluate long term outcomes for the intervention arm as well as  
26 the effects of the control arm receiving the intervention. Consistent with local norms participants receive a  
27 R150 (approximately \$12USD) gift voucher for completing each assessment.  
28  
29  
30  
31

32 Assessments are conducted by study staff who travel to club sites or nearby suitable locations. At  
33 enrollment, club members complete informed consent, eligibility screening, and baseline assessment. All  
34 participants are assessed on demographics, eligibility criteria, and key outcome measures (i.e., Body Mass  
35 Index [BMI], blood pressure, and HbA1c). At the end of assessments, study staff give each participant a  
36 feedback form with their biometric data and explain their results. Due to resource limitations and  
37 logistics, only a randomly selected sub-sample of 12 participants per club complete the lipids and self-  
38 report survey assessments described below. All survey measures were translated to Xhosa and back-  
39 translated to English. During this process, we applied some minor cultural adaptations to increase  
40 relevance and comprehensibility of certain items and also harmonized some response scales across  
41 instruments to reduce complexity for respondents. All data are collected by trained Xhosa speaking  
42 interviewers using tablets and the REDCap data management system [46].  
43  
44  
45  
46  
47  
48  
49  
50  
51  
52  
53  
54  
55  
56  
57  
58  
59  
60



**Measures:**

The primary outcome will be percentage of weight lost between baseline and the first follow-up assessment. Weight is measured to the half kilogram with a standard electronic scale. Participants are asked to wear light clothing and to fast the morning of enrollment. They are asked to remove footwear, heavy clothing/accessories prior before being weighed. Height is measured in order to calculate Body Mass Index (BMI) to determine eligibility. Height is measured to the nearest millimeter with the participant standing straight against a standard stadiometer. BMI is calculated as weight in kilograms divided by the square of height in meters.

Blood pressure is assessed by staff with calibrated portable automated instruments (Omrons HBP1300), averaging two or three independent measurements according to American Heart Association Council on High Blood Pressure Research Methods [47]. Non-fasting HbA1c, triglycerides, and LDL cholesterol are measured via automated assay from a capillary sample using an Afinion AS100 analyzer [48]. Medication use is assessed by asking participants to bring all their medications to the enrollment session. Interviewers recorded the medication name and dose including use of HIV antiretroviral medications.

Demographic measures are assessed via participant survey and include age, gender, education level, income level, and housing type. Dietary intake focuses on intake of whole grains, fruits and vegetables, fiber, and sugar, measured with an adaptation of the NHANES Dietary Screener Questionnaire [49]. Physical activity is measured using the International Physical Activity Questionnaire-Short Form [50], and health-related quality of life is measured with the Veterans RAND 12-item Health Survey [51,52].

**Data Analysis:***Power analysis*

Power analyses were conducted using the Optimal Design software for cluster-randomized trials with person-level outcomes. Prior studies of lifestyle interventions have indicated that the intra-class

1  
2  
3 correlation coefficient (ICC) of the main outcome (percent weight loss) will likely be small (e.g., .01).  
4  
5 Therefore, values of .01 and .05 were considered in the power analysis for conservative estimation.  
6  
7 Because of the community-based nature of the trial, the study committed to enroll as many eligible and  
8  
9 interested club members as possible. The power analysis was therefore used to determine the adequacy of  
10  
11 the anticipated sample size. At the time of conducting our power analysis, we had one NGO partner and  
12  
13 anticipated a sample of 54 clusters averaging approximately 10 participants each for a total N of 540.  
14  
15 However, government changes in NGO designated areas of responsibility and withdrawal from  
16  
17 participation in the trial of one branch of our NGO partner changed our plans. After recruiting a second  
18  
19 NGO partner we anticipate 28 total clusters averaging 18-19 participants for a total N of 518. In order to  
20  
21 allow for up to 25% attrition, cluster sizes of 19 and 15 were included in the power analysis. Assuming an  
22  
23 ICC of .01, we projected that we would have 0.80 power to detect even small effect sizes of 0.28 and 0.31  
24  
25 with cluster sample sizes of 19 and 15 respectively. If we conservatively assume an ICC of 0.05, we  
26  
27 projected we would still have 0.80 power to detect effect sizes of 0.35 and 0.37 with sample sizes of 19  
28  
29 and 15 per cluster. Using the pooled standard deviation from Look AHEAD (5.8), the largest trial of  
30  
31 overweight/obese type-2 diabetic patients [24] and a conservative estimate of a 3.15% weight loss for the  
32  
33 treatment group and a 1% loss for the control group, a conservative estimated effect size for weight-loss  
34  
35 in the current study would be 0.37. This estimate is larger than the effect we will be able to detect with .80  
36  
37 power as we will be able to detect a percent weight loss difference of 1.6-1.7% between groups.  
38  
39  
40  
41  
42

#### 43 *Planned analytic strategy*

44  
45 To accommodate the cluster randomized design, all analyses will be conducted with a multilevel  
46  
47 modeling framework using SAS PROC MIXED. In this design, participants (Level-1 units) will be nested  
48  
49 within CHW pairs (Level-2 units). Primary analyses will use an intention-to-treat strategy. Exploratory  
50  
51 analyses will also examine low vs. high dose (i.e., sessions attended) effects. Unconditional models will  
52  
53 be examined with each dependent variable to determine the amount of between and within cluster  
54  
55  
56  
57  
58  
59  
60

1  
2  
3 variance. Some questions involve comparison of effects between conditions and some involve change  
4  
5 within a condition.  
6

7 Preliminary analyses will examine baseline equivalence across the two treatment conditions on  
8  
9 variables that may impact outcome (e.g., medication use) to identify covariates for the main analyses. If  
10  
11 groups differ at baseline, baseline values will be added to the models as covariates. To address the  
12  
13 primary research question regarding differences in % weight loss at the end of Year 1, % weight loss from  
14  
15 baseline to the end of Year 1 will be the dependent variable in the multi-level model described above. The  
16  
17 significance of the fixed effect for treatment group will indicate if there are differences in overall  
18  
19 outcomes across groups. Anticipated effects are directional in that *Lifestyle Africa* participants should  
20  
21 respond better than control participants. Similar models will be evaluated for each of the secondary  
22  
23 outcomes. Relevant covariates will be added to the models as appropriate (e.g., use of diabetic  
24  
25 medications for weight loss).  
26  
27

28 To determine if the *Lifestyle Africa* intervention group maintains its response to the intervention over  
29  
30 the second year, scores at the Year 1 assessment will be compared to those at the Year 2 assessment.  
31  
32 Random intercepts for health club and participant nested within health club will be included in the model.  
33  
34 The significance of the fixed effect for time will indicate whether or not participants were able to  
35  
36 maintain their response. This type of maintenance model will be evaluated for each of the outcomes of  
37  
38 interest individually. Similar models will be used to examine intervention response within each of the  
39  
40 study arms to determine if intervention effectiveness is replicated in the control group. If there are no  
41  
42 differences between groups in the assessments taken just prior to participating in the *Lifestyle Africa*  
43  
44 intervention, we will combine the groups and examine potential predictors of treatment effectiveness such  
45  
46 as fidelity at level two and attendance at level one.  
47  
48  
49  
50

### 51 **Monitoring:**

52 A Data Safety Monitoring Board (DSMB) oversees the study and approved the stopping rules.  
53  
54 The DSMB operates independently from the study investigators and the funder and comprises members  
55  
56  
57  
58  
59  
60

1  
2  
3 based in the United States and South Africa and includes a psychologist, a physician, a doctor of public  
4 health, and a statistician with expertise relevant to the trial. Details of the DSMB operating procedures are  
5 described in the DSMB charter. The DSMB may require termination (stopping rules) or modification of  
6 the study for: (1) any perceived safety concern including concerns related to adverse events or (2) because  
7 of severe failure to recruit or retain participants. There is no interim analysis or stopping rule related to an  
8 interim analysis because the intervention involves minimal risk to participants and even in the absence of  
9 indications of weight loss, the intervention may yield other educational or psychological benefits. In  
10 addition, stopping for reasons other than safety could be negatively perceived by community partners,  
11 CHWs, and club members. As part of usual care, CHWs and supervising nurses monitor the health of  
12 participants and refer patients to their physician, or local health clinic, or emergency service as needed.  
13 Study staff continuously monitor unanticipated problems or serious adverse events which can be  
14 identified by CHWs, NGO staff, participants, participants' families, participants' physicians or other  
15 health professionals. Events are investigated, documented, and reported to the principal investigators who  
16 report to the DSMB in accord with their regulations and to the Institutional Review Board (IRB) and the  
17 funder if appropriate.  
18  
19  
20  
21  
22  
23  
24  
25  
26  
27  
28  
29  
30  
31  
32  
33  
34  
35  
36

### 37 **Ethics and Dissemination**

38  
39 Our study protocol has been approved by the Institutional Review Boards (IRBs) at the  
40 University of Cape Town (the primary IRB) and Children's Mercy Kansas City and the University of the  
41 Western Cape. Any amendments are approved by the IRB. Protocol modifications are communicated to  
42 study staff during regular meetings and when relevant, to CHWs and participants through personal  
43 outreach and through regular meetings with NGO partners. Written informed consent is collected from all  
44 participants prior to eligibility screening and enrollment. Multiple protections for participant  
45 confidentiality are in place. Participant identifiers (name and contact information) are marked as an  
46 identifier in REDCap and are then censored when the database is downloaded for analysis. Only trained  
47 study staff have access to REDCap databases during data collection. All identifying information will be  
48  
49  
50  
51  
52  
53  
54  
55  
56  
57  
58  
59  
60

1  
2  
3 removed with the deletion of the REDCap project at the end of the study. Consent forms and signature  
4  
5 logs for reimbursements will be secured in a locked file cabinet within a locked office on a secured floor.  
6

7 A full data package will be maintained by the investigators for at least seven years after data  
8  
9 collection is complete. Third-party access to the full data package will be addressed by the investigators  
10  
11 on a case-by-case basis. Results will be disseminated through publication in peer-reviewed journals and  
12  
13 conference presentations. *Lifestyle Africa* curricula will be made available to local stakeholders such as  
14  
15 Universities and the Department of Health. Study progress and findings will also be updated on  
16  
17 [clinicaltrials.gov](https://clinicaltrials.gov) (#NCT03342274).  
18  
19  
20  
21

## 22 Discussion

23  
24 The growing burden of NCDs in low and middle-income countries presents a critical need for  
25  
26 evidence-based interventions that address behavioral contributors to the prevention and management of  
27  
28 CVD and DM. Our study aims to adapt one of the strongest existing evidence-based lifestyle behavior  
29  
30 change interventions to the context of low-income, under-resourced urban areas of sub-Saharan Africa  
31  
32 and rigorously assess its impact in a cluster RCT. Results will inform both the feasibility and  
33  
34 effectiveness of an intervention delivery model that uses CHWs as facilitators, video as the primary  
35  
36 medium for delivering content, and enhancement of the DPP with Motivational Interviewing principles  
37  
38 and a text message system. This will be an important addition to similar efforts that have targeted more  
39  
40 educated and resourced populations in India [53].  
41  
42

43 Successful outcomes will hinge on both successful program delivery as well as participant  
44  
45 engagement and retention. The main outcomes will therefore need to be interpreted in the context of key  
46  
47 aspects of study implementation including the success of training CHWs, the reliability and fidelity with  
48  
49 which sessions are delivered, and the engagement of participants. Upon completion of the study, a process  
50  
51 evaluation is planned to enhance understanding of the outcomes by assessing CHW and participant  
52  
53 perspectives on the strengths and weaknesses of the program. Through training and technical support the  
54  
55  
56  
57  
58  
59  
60

1  
2  
3 project also aims to build capacity in partner NGOs to continue the program after the study has been  
4  
5 completed.

6  
7 Strengths of the study include its community engaged development process which has led to an  
8  
9 intervention design that fits with the existing models of care of our partner NGOs and may be transferable  
10  
11 to programs aimed at other NCDs. The study's pragmatic design, including broad inclusion criteria,  
12  
13 should also lead to findings that are relevant and generalizable to many communities in low and middle-  
14  
15 income countries. Although the study is pragmatic and the result of a community-engaged process, it uses  
16  
17 a rigorous cluster randomized design with objective measurements of key biometric and biologic  
18  
19 outcomes related to diabetes and cardiovascular disease. Chief among the challenges of the trial will be to  
20  
21 achieve adequate reliability and fidelity in the delivery of the intervention in the context of an  
22  
23 impoverished environment where resources are limited, residents are taxed trying to meet their basic  
24  
25 needs, and social disruptions (e.g., strikes, protests, crime) are frequent. Limitations include low precision  
26  
27 of measures like dietary and physical activity recalls as well as limitations of measure breadth due to low  
28  
29 literacy.  
30  
31

32  
33 Regardless of the efficacy findings of the study, results should provide an important first step in  
34  
35 understanding how lifestyle interventions such as the DPP might be disseminated in similar communities  
36  
37 with few resources and low levels of education and literacy. Studies evaluating lifestyle behavior change  
38  
39 interventions in low and middle-income countries are vital for addressing the epidemic of diabetes and  
40  
41 cardiovascular disease.  
42  
43  
44

45 **Figure legend:** Figure 1: Flow of study procedures (repeated for each of two waves of participants)  
46  
47  
48  
49

---

## 50 51 52 **Acknowledgements** 53

54  
55 The authors acknowledge the contributions made by our Community Advisory Board in designing this  
56  
57  
58  
59

1  
2  
3 study.  
4  
5  
6

### 7 **Competing Interests**

8  
9 The authors declare no competing interests.  
10  
11  
12

### 13 **Author Contributions**

14  
15 All authors made substantial contributions to the design of the study. DC led the study design, with other  
16 authors collaborating on the design of specific aspects (TP/LT/KR/MZV/EVL/NSL- DPP intervention  
17 content; EAH/KR/KG/TP/LT- measures and outcomes; JMS- text message component; KR/KG-  
18 motivational interviewing content). KF contributed to the research design and led the development of the  
19 statistical analysis plan. DC and EAH drafted the manuscript and all others contributed to revising it  
20 critically for important intellectual content. All authors reviewed and approved of the final version  
21 submitted for publication and agree to be accountable for all aspects of the work in ensuring that questions  
22 related to accuracy and integrity are appropriately investigated and resolved.  
23  
24  
25  
26  
27  
28  
29  
30  
31

### 32 **Funding**

33  
34 This work was supported by National Heart Lung and Blood Institute of the National Institutes of Health  
35 under award number R01HL126099. The content is solely the responsibility of the authors and does not  
36 necessarily represent the official views of the National Institutes of Health.  
37  
38  
39  
40  
41  
42  
43  
44  
45  
46  
47  
48  
49  
50  
51  
52  
53  
54  
55  
56  
57  
58  
59  
60

## References

- 1 World Health Organization. Global health estimates 2015: deaths by cause, age, sex, by country and by region. Geneva: 2016.  
[http://www.who.int/healthinfo/global\\_burden\\_disease/estimates/en/index1.html](http://www.who.int/healthinfo/global_burden_disease/estimates/en/index1.html)
- 2 Mathers CD, Loncar D. Projections of global mortality and burden of disease from 2002 to 2030. *PLoS Med* 2006;**3**:2011–30. doi:10.1371/journal.pmed.0030442
- 3 Drewnowski A, Popkin BM. The nutrition transition: new trends in the global diet. *Nutr Rev* 1997;**55**:31–43. doi:10.1111/j.1753-4887.1997.tb01593.x
- 4 Popkin BM. The Nutrition Transition in the Developing World. *Dev Policy Rev* 2003;**21**:581–97. doi:10.1111/j.1467-8659.2003.00225.x
- 5 Kruger HS, Venter CS, Vorster HH. Physical inactivity as a risk factor for cardiovascular disease in communities undergoing rural to urban transition: the THUSA study. *Cardiovasc J South Africa* 2003;**14**:16–23. <http://www.ncbi.nlm.nih.gov/pubmed/12621539>
- 6 Beaglehole R, Yach D. Globalisation and the prevention and control of non-communicable disease: The neglected chronic diseases of adults. *Lancet*. 2003;**362**:903–8. doi:10.1016/S0140-6736(03)14335-8
- 7 Bradley HA, Puoane T. Prevention of hypertension and diabetes in an urban setting in South Africa: participatory action research with community health workers. *Ethn Dis* 2007;**17**:49–54.
- 8 Bourne LT, Lambert E V, Steyn K. Where does the black population of South Africa stand on the nutrition transition? *Public Health Nutr* 2002;**5**. doi:10.1079/PHN2001288
- 9 Friel S, Chopra M, Satcher D. Unequal weight: equity oriented policy responses to the global obesity epidemic. *BMJ* 2007;**335**:1241–3. doi:10.1136/bmj.39377.622882.47
- 10 Puoane T, Bradley H, Hughes G. Community intervention for the emerging epidemic of non-communicable diseases. *South African J Clin Nutr* 2006;**19**:56–62.  
doi:10.1080/16070658.2006.11734094
- 11 Reddy SP, Resnicow K, James S, *et al*. Underweight, overweight and obesity among South



- 1  
2  
3 African adolescents: Results of the 2002 National Youth Risk Behaviour Survey. *Public Health*  
4  
5 *Nutr* 2009;**12**:203–7. doi:10.1017/S1368980008002656  
6  
7  
8 12 Steyn K, Kazenellenbogen JM, Lombard CJ, *et al.* Urbanization and the risk for chronic diseases  
9  
10 of lifestyle in the black population of the Cape Peninsula, South Africa. *J Cardiovasc Risk*  
11  
12 1997;**4**:135–42. <http://www.ncbi.nlm.nih.gov/pubmed/9304495>  
13  
14 13 Sliwa K, Wilkinson D, Hansen C, *et al.* Spectrum of heart disease and risk factors in a black urban  
15  
16 population in South Africa (the Heart of Soweto Study): a cohort study. *Lancet* 2008;**371**:915–22.  
17  
18 doi:10.1016/S0140-6736(08)60417-1  
19  
20 14 Steyn K, Sliwa K, Hawken S, *et al.* Risk factors associated with myocardial infarction in Africa:  
21  
22 the INTERHEART Africa study. *Circulation* 2005;**112**:3554–61.  
23  
24 doi:10.1161/CIRCULATIONAHA.105.563452  
25  
26 15 Tibazarwa K, Ntyintyane L, Sliwa K, *et al.* A time bomb of cardiovascular risk factors in South  
27  
28 Africa: Results from the Heart of Soweto Study ‘Heart Awareness Days’. *Int J Cardiol*  
29  
30 2009;**132**:233–9. doi:10.1016/j.ijcard.2007.11.067  
31  
32  
33 16 Steyn NP, Bradshaw D, Norman R, *et al.* Dietary changes and the health transition in South  
34  
35 Africa: implications for health policy. In: *The double burden of malnutrition: Case Studies from*  
36  
37 *six developing countries*. 2006. 259–303. <http://www.fao.org/docrep/009/a0442e/a0442e00.HTM>  
38  
39 17 World Health Organization. Prevalence of obesity among adults, BMI  $\geq$  30, age-standardized:  
40  
41 Estimates by country. Glob. Heal. Obs. Data Repos.  
42  
43 2017. <http://apps.who.int/gho/data/node.main.A900A?lang=en>  
44  
45 18 Marie N, Flemming T, Robinson M, *et al.* Global, regional, and national prevalence of overweight  
46  
47 and obesity in children and adults during 1980–2013: a systematic analysis for the Global Burden  
48  
49 of Disease Study 2013. *Lancet*. 2013;**384**:766–81. doi:10.1016/S0140-6736(14)60460-8  
50  
51 19 National Department of Health (NDoH), Statistics South Africa (Stats SA), (SAMRC) SAMRC, *et*  
52  
53 *al.* South Africa Demographic and Health Survey 2016: Key Indicators. Pretoria, South Africa,  
54  
55 and Rockville, Maryland, USA: 2017.  
56  
57  
58  
59  
60

- 1  
2  
3 20 Republic of South Africa Department of Health. Strategy for the prevention and control of obesity  
4 in South Africa 2015-2020. Pretoria: 2016.  
5  
6  
7 21 DPP Research Group. National Diabetes Prevention Program.  
8  
9 <http://www.cdc.gov/diabetes/prevention/>  
10  
11 22 Knowler WC, Barrett-Connor E, Fowler SE, *et al.* Reduction in the incidence of type 2 diabetes  
12 with lifestyle intervention or metformin. *N Engl J Med* 2002;**346**:393–403.  
13  
14  
15  
16 doi:10.1056/NEJMoa012512  
17  
18 23 The Look AHEAD research group, Look AHEAD Research Group LAR, Pi-Sunyer X, *et al.*  
19  
20 Reduction in weight and cardiovascular disease risk factors in individuals with type 2 diabetes:  
21 one-year results of the look AHEAD trial. *Diabetes Care* 2007;**30**:1374–83. doi:10.2337/dc07-  
22  
23  
24 0048  
25  
26 24 Wadden TA, West DS, Neiberg RH, *et al.* One-year weight losses in the look AHEAD study:  
27  
28 Factors associated with success. *Obesity* 2009;**17**:713–22. doi:10.1038/oby.2008.637  
29  
30  
31 25 Wadden TA, Neiberg RH, Wing RR, *et al.* Four-year weight losses in the look AHEAD study:  
32  
33 Factors associated with long-term success. *Obesity* 2011;**19**:1987–98. doi:10.1038/oby.2011.230  
34  
35 26 Ackermann RT, Marrero DG. Adapting the Diabetes Prevention Program lifestyle intervention for  
36  
37 delivery in the community: The YMCA model. *Diabetes Educ.* 2007;**33**:69–78.  
38  
39  
40  
41 27 Ackermann RT, Finch EA, Brizendine E, *et al.* Translating the Diabetes Prevention Program into  
42  
43 the Community. The DEPLOY Pilot Study. *Am J Prev Med* 2008;**35**:357–63.  
44  
45  
46  
47  
48 28 Boltri JM, Davis-Smith YM, Seale JP, *et al.* Diabetes prevention in a faith-based setting: Results  
49  
50 of translational research. *J Public Heal Manag Pract* 2008;**14**:29–32.  
51  
52  
53  
54 29 McTigue KM, Conroy MB, Bigi L, *et al.* Weight loss through living well: Translating an effective  
55  
56 lifestyle intervention into clinical practice. *Diabetes Educ* 2009;**35**:199–208.  
57  
58  
59  
60

- 1  
2  
3 doi:10.1177/0145721709332815  
4  
5  
6 30 Amundson HA, Butcher MK, Gohdes D, *et al.* Translating the diabetes prevention program into  
7 practice in the general community: Findings from the Montana cardiovascular disease and diabetes  
8 prevention program. *Diabetes Educ* 2009;**35**:209–23. doi:10.1177/014572170933269  
9  
10  
11 31 Joiner KL, Nam S, Whittemore R. Lifestyle interventions based on the diabetes prevention  
12 program delivered via eHealth: A systematic review and meta-analysis. *Prev. Med. (Baltim)*.  
13 2017;**100**:194–207. doi:10.1016/j.ypmed.2017.04.033  
14  
15  
16 32 Ali MK, Echouffo-Tcheugui J, Williamson DF. How effective were lifestyle interventions in real-  
17 world settings that were modeled on the diabetes prevention program? *Health Aff* 2012;**31**:67–75.  
18 doi:10.1377/hlthaff.2011.1009  
19  
20  
21  
22  
23  
24 33 Ruggiero L, Castillo A, Quinn L, *et al.* Translation of the diabetes prevention program’s lifestyle  
25 intervention: Role of community health workers. *Curr. Diab. Rep.* 2012;**12**:127–37.  
26  
27  
28 doi:10.1007/s11892-012-0254-y  
29  
30  
31 34 Klein S, Sheard NF, Pi-Sunyer X, *et al.* Weight Management Through Lifestyle Modification for  
32 the Prevention and Management of Type 2 Diabetes: Rationale and Strategies. *Diabetes Care*  
33 2004;**27**:2067–73. doi:10.2337/diacare.27.8.2067  
34  
35  
36  
37 35 Bangdiwala SI, Fonn S, Okoye O, *et al.* Workforce resources for health in developing countries.  
38 *Public Health Rev.* 2010;**32**:296–318. doi:10.1007/BF03391604  
39  
40  
41 36 Lester RT, Gelmon L, Plummer FA. Cell phones: Tightening the communication gap in resource-  
42 limited antiretroviral programmes? [5]. *AIDS.* 2006;**20**:2242–4.  
43  
44  
45 doi:10.1097/QAD.0b013e3280108508  
46  
47  
48 37 Cole-Lewis H, Kershaw T. Text messaging as a tool for behavior change in disease prevention and  
49 management. *Epidemiol. Rev.* 2010;**32**:56–69. doi:10.1093/epirev/mxq004  
50  
51  
52 38 Statistics South Africa (Stats SA). Census 2011 statistical release. Pretoria: 2012.  
53  
54  
55 39 Malhotra R, Hoyo C, Østbye T, *et al.* Determinants of obesity in an urban township of South  
56 Africa. *South African J Clin Nutr* 2008;**21**:315–20. doi:10.1080/16070658.2008.11734173  
57  
58  
59  
60

- 1  
2  
3 40 Peer N, Steyn K, Lombard C, *et al.* Rising Diabetes Prevalence among Urban-Dwelling Black  
4 South Africans. *PLoS One* 2012;**7**. doi:10.1371/journal.pone.0043336  
5  
6  
7 41 Puoane TR, Tsolekile L, Igumbor EU, *et al.* Experiences in developing and implementing health  
8 clubs to reduce hypertension risk among adults in a south african population in transition. *Int. J.*  
9  
10  
11  
12  
13  
14 42 Research TLA. Baseline characteristics of the randomized cohort from the Look AHEAD (Action  
15 for Health in Diabetes) Research Study. *Dianestes Vasc Res* 2006;**3**:202–15.  
16  
17  
18  
19  
20 43 Venditti EM, Kramer MK. Necessary components for lifestyle modification interventions to  
21 reduce diabetes risk. *Curr Diab Rep* 2012;**12**:138–46. doi:10.1007/s11892-012-0256-9  
22  
23  
24 44 Miller WR, Rollnick S. *Motivational Interviewing, Third Edition: Helping People Change*. 2012.  
25  
26  
27  
28  
29 45 McMaster F, Resnicow K. Validation of the one pass measure for motivational interviewing  
30 competence. *Patient Educ Couns* 2015;**98**:499–505. doi:10.1016/j.pec.2014.12.014  
31  
32  
33 46 Harris PA, Taylor R, Thielke R, *et al.* Research electronic data capture (REDCap)-A metadata-  
34 driven methodology and workflow process for providing translational research informatics  
35 support. *J Biomed Inform* 2009;**42**:377–81. doi:10.1016/j.jbi.2008.08.010  
36  
37  
38  
39 47 Pickering TG, Hall JE, Appel LJ, *et al.* Recommendations for blood pressure measurement in  
40 humans and experimental animals. Part 1: Blood pressure measurement in humans. *Hypertension*  
41  
42  
43  
44  
45 48 Arabadjief M, Nichols JH. Evaluation of the afinion AS100 point-of-care analyzer for hemoglobin  
46  
47  
48  
49  
50 49 Thompson FE, Midthune D, Kahle L, *et al.* Development and Evaluation of the National Cancer  
51 Institute’s Dietary Screener Questionnaire Scoring Algorithms. *J Nutr* 2017;**147**:1226–33.  
52  
53  
54  
55  
56 50 Craig CL, Marshall AL, Sjöström M, *et al.* International physical activity questionnaire: 12-

Country reliability and validity. *Med Sci Sports Exerc* 2003;**35**:1381–95.

doi:10.1249/01.MSS.0000078924.61453.FB

51 Jones D, Kazis L, Lee A, *et al*. Health status assessments using the Veterans SF-12 and SF-36:  
9 methods for evaluating outcomes in the Veterans Health Administration. *J Ambul Care Manag*  
11 2001;**24**:68–86. doi:10.1097/00004479-200107000-00011

52 Selim AJ, Rogers W, Fleishman JA, *et al*. Updated U.S. population standard for the Veterans  
15 RAND 12-item Health Survey (VR-12). *Qual Life Res* 2009;**18**:43–52. doi:10.1007/s11136-008-  
17 9418-2

53 Sathish T, Williams ED, Pasricha N, *et al*. Cluster randomised controlled trial of a peer-led  
21 lifestyle intervention program: Study protocol for the Kerala diabetes prevention program. *BMC*  
23 *Public Health* 2013;**13**. doi:10.1186/1471-2458-13-1035

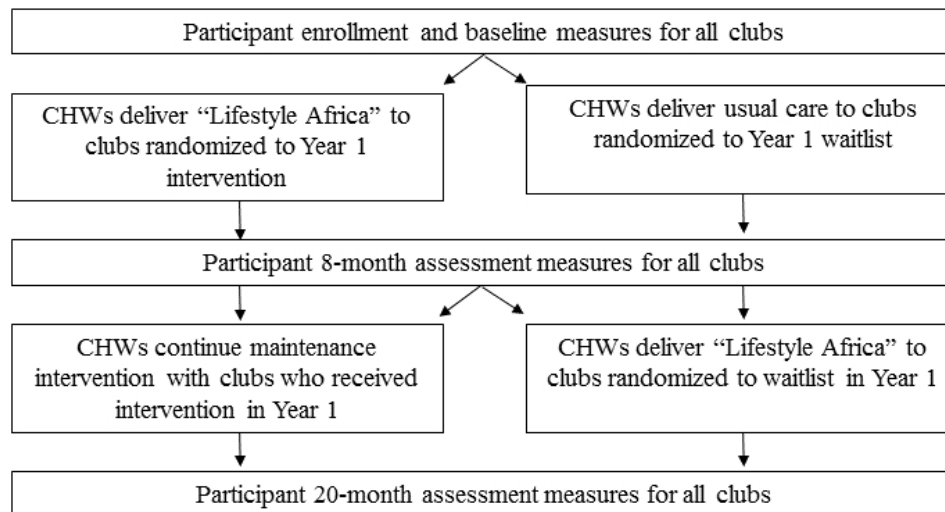

Flow of study procedures (repeated for each of two waves of participants)

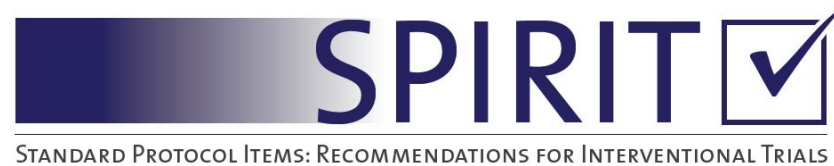

SPIRIT 2013 Checklist: Recommended items to address in a clinical trial protocol and related documents\*

| Section/item                      | Item No | Description                                                                                                                                                                                                                                                                              | Addressed on page number                          |
|-----------------------------------|---------|------------------------------------------------------------------------------------------------------------------------------------------------------------------------------------------------------------------------------------------------------------------------------------------|---------------------------------------------------|
| <b>Administrative information</b> |         |                                                                                                                                                                                                                                                                                          |                                                   |
| Title                             | 1       | Descriptive title identifying the study design, population, interventions, and, if applicable, trial acronym                                                                                                                                                                             | __1__                                             |
| Trial registration                | 2a      | Trial identifier and registry name. If not yet registered, name of intended registry                                                                                                                                                                                                     | __2__                                             |
|                                   | 2b      | All items from the World Health Organization Trial Registration Data Set                                                                                                                                                                                                                 | <u>throughout document and NCT trial registry</u> |
| Protocol version                  | 3       | Date and version identifier                                                                                                                                                                                                                                                              | __1__                                             |
| Funding                           | 4       | Sources and types of financial, material, and other support                                                                                                                                                                                                                              | __19__                                            |
| Roles and responsibilities        | 5a      | Names, affiliations, and roles of protocol contributors                                                                                                                                                                                                                                  | __1__                                             |
|                                   | 5b      | Name and contact information for the trial sponsor                                                                                                                                                                                                                                       | __19__                                            |
|                                   | 5c      | Role of study sponsor and funders, if any, in study design; collection, management, analysis, and interpretation of data; writing of the report; and the decision to submit the report for publication, including whether they will have ultimate authority over any of these activities | <u>None (see p. 21)</u>                           |

|    |                                                           |     |                                                                                                                                                                                                                                                                  |                              |
|----|-----------------------------------------------------------|-----|------------------------------------------------------------------------------------------------------------------------------------------------------------------------------------------------------------------------------------------------------------------|------------------------------|
| 1  |                                                           | 5d  | Composition, roles, and responsibilities of the coordinating centre, steering committee, endpoint adjudication committee, data management team, and other individuals or groups overseeing the trial, if applicable (see Item 21a for data monitoring committee) | __N/A__                      |
| 2  |                                                           |     |                                                                                                                                                                                                                                                                  |                              |
| 3  |                                                           |     |                                                                                                                                                                                                                                                                  |                              |
| 4  |                                                           |     |                                                                                                                                                                                                                                                                  |                              |
| 5  |                                                           |     |                                                                                                                                                                                                                                                                  |                              |
| 6  |                                                           |     |                                                                                                                                                                                                                                                                  |                              |
| 7  |                                                           |     |                                                                                                                                                                                                                                                                  |                              |
| 8  |                                                           |     |                                                                                                                                                                                                                                                                  |                              |
| 9  | <b>Introduction</b>                                       |     |                                                                                                                                                                                                                                                                  |                              |
| 10 |                                                           |     |                                                                                                                                                                                                                                                                  |                              |
| 11 | Background and rationale                                  | 6a  | Description of research question and justification for undertaking the trial, including summary of relevant studies (published and unpublished) examining benefits and harms for each intervention                                                               | __3-5__                      |
| 12 |                                                           |     |                                                                                                                                                                                                                                                                  |                              |
| 13 |                                                           |     |                                                                                                                                                                                                                                                                  |                              |
| 14 |                                                           | 6b  | Explanation for choice of comparators                                                                                                                                                                                                                            | __6__                        |
| 15 |                                                           |     |                                                                                                                                                                                                                                                                  |                              |
| 16 | Objectives                                                | 7   | Specific objectives or hypotheses                                                                                                                                                                                                                                | __5-6__                      |
| 17 |                                                           |     |                                                                                                                                                                                                                                                                  |                              |
| 18 | Trial design                                              | 8   | Description of trial design including type of trial (eg, parallel group, crossover, factorial, single group), allocation ratio, and framework (eg, superiority, equivalence, noninferiority, exploratory)                                                        | __7-8__                      |
| 19 |                                                           |     |                                                                                                                                                                                                                                                                  |                              |
| 20 |                                                           |     |                                                                                                                                                                                                                                                                  |                              |
| 21 |                                                           |     |                                                                                                                                                                                                                                                                  |                              |
| 22 | <b>Methods: Participants, interventions, and outcomes</b> |     |                                                                                                                                                                                                                                                                  |                              |
| 23 |                                                           |     |                                                                                                                                                                                                                                                                  |                              |
| 24 | Study setting                                             | 9   | Description of study settings (eg, community clinic, academic hospital) and list of countries where data will be collected. Reference to where list of study sites can be obtained                                                                               | __6__                        |
| 25 |                                                           |     |                                                                                                                                                                                                                                                                  |                              |
| 26 |                                                           |     |                                                                                                                                                                                                                                                                  |                              |
| 27 | Eligibility criteria                                      | 10  | Inclusion and exclusion criteria for participants. If applicable, eligibility criteria for study centres and individuals who will perform the interventions (eg, surgeons, psychotherapists)                                                                     | __8__                        |
| 28 |                                                           |     |                                                                                                                                                                                                                                                                  |                              |
| 29 |                                                           |     |                                                                                                                                                                                                                                                                  |                              |
| 30 | Interventions                                             | 11a | Interventions for each group with sufficient detail to allow replication, including how and when they will be administered                                                                                                                                       | __9-12__                     |
| 31 |                                                           |     |                                                                                                                                                                                                                                                                  |                              |
| 32 |                                                           |     |                                                                                                                                                                                                                                                                  |                              |
| 33 |                                                           |     |                                                                                                                                                                                                                                                                  |                              |
| 34 |                                                           | 11b | Criteria for discontinuing or modifying allocated interventions for a given trial participant (eg, drug dose change in response to harms, participant request, or improving/worsening disease)                                                                   | __16__                       |
| 35 |                                                           |     |                                                                                                                                                                                                                                                                  |                              |
| 36 |                                                           |     |                                                                                                                                                                                                                                                                  |                              |
| 37 |                                                           | 11c | Strategies to improve adherence to intervention protocols, and any procedures for monitoring adherence (eg, drug tablet return, laboratory tests)                                                                                                                | __12 (fidelity monitoring)__ |
| 38 |                                                           |     |                                                                                                                                                                                                                                                                  |                              |
| 39 |                                                           |     |                                                                                                                                                                                                                                                                  |                              |
| 40 |                                                           | 11d | Relevant concomitant care and interventions that are permitted or prohibited during the trial                                                                                                                                                                    | __12 (usual care)__          |
| 41 |                                                           |     |                                                                                                                                                                                                                                                                  |                              |
| 42 |                                                           |     |                                                                                                                                                                                                                                                                  |                              |



|    |                      |    |                                                                                                                                                                                                                                                                                                                                                                                |                |
|----|----------------------|----|--------------------------------------------------------------------------------------------------------------------------------------------------------------------------------------------------------------------------------------------------------------------------------------------------------------------------------------------------------------------------------|----------------|
| 1  | Outcomes             | 12 | Primary, secondary, and other outcomes, including the specific measurement variable (eg, systolic blood pressure), analysis metric (eg, change from baseline, final value, time to event), method of aggregation (eg, median, proportion), and time point for each outcome. Explanation of the clinical relevance of chosen efficacy and harm outcomes is strongly recommended | ___6___        |
| 2  |                      |    |                                                                                                                                                                                                                                                                                                                                                                                |                |
| 3  |                      |    |                                                                                                                                                                                                                                                                                                                                                                                |                |
| 4  |                      |    |                                                                                                                                                                                                                                                                                                                                                                                |                |
| 5  |                      |    |                                                                                                                                                                                                                                                                                                                                                                                |                |
| 6  | Participant timeline | 13 | Time schedule of enrolment, interventions (including any run-ins and washouts), assessments, and visits for participants. A schematic diagram is highly recommended (see Figure)                                                                                                                                                                                               | Figure 1; p. 7 |
| 7  |                      |    |                                                                                                                                                                                                                                                                                                                                                                                |                |
| 8  |                      |    |                                                                                                                                                                                                                                                                                                                                                                                |                |
| 9  | Sample size          | 14 | Estimated number of participants needed to achieve study objectives and how it was determined, including clinical and statistical assumptions supporting any sample size calculations                                                                                                                                                                                          | ___14-15___    |
| 10 |                      |    |                                                                                                                                                                                                                                                                                                                                                                                |                |
| 11 |                      |    |                                                                                                                                                                                                                                                                                                                                                                                |                |
| 12 |                      |    |                                                                                                                                                                                                                                                                                                                                                                                |                |
| 13 | Recruitment          | 15 | Strategies for achieving adequate participant enrolment to reach target sample size                                                                                                                                                                                                                                                                                            | ___8___        |
| 14 |                      |    |                                                                                                                                                                                                                                                                                                                                                                                |                |

### Methods: Assignment of interventions (for controlled trials)

#### Allocation:

|    |                                  |     |                                                                                                                                                                                                                                                                                                                                                          |               |
|----|----------------------------------|-----|----------------------------------------------------------------------------------------------------------------------------------------------------------------------------------------------------------------------------------------------------------------------------------------------------------------------------------------------------------|---------------|
| 19 | Sequence generation              | 16a | Method of generating the allocation sequence (eg, computer-generated random numbers), and list of any factors for stratification. To reduce predictability of a random sequence, details of any planned restriction (eg, blocking) should be provided in a separate document that is unavailable to those who enrol participants or assign interventions | ___8___       |
| 20 |                                  |     |                                                                                                                                                                                                                                                                                                                                                          |               |
| 21 |                                  |     |                                                                                                                                                                                                                                                                                                                                                          |               |
| 22 |                                  |     |                                                                                                                                                                                                                                                                                                                                                          |               |
| 23 |                                  |     |                                                                                                                                                                                                                                                                                                                                                          |               |
| 24 |                                  |     |                                                                                                                                                                                                                                                                                                                                                          |               |
| 25 | Allocation concealment mechanism | 16b | Mechanism of implementing the allocation sequence (eg, central telephone; sequentially numbered, opaque, sealed envelopes), describing any steps to conceal the sequence until interventions are assigned                                                                                                                                                | ___N/A (8)___ |
| 26 |                                  |     |                                                                                                                                                                                                                                                                                                                                                          |               |
| 27 |                                  |     |                                                                                                                                                                                                                                                                                                                                                          |               |
| 28 |                                  |     |                                                                                                                                                                                                                                                                                                                                                          |               |
| 29 | Implementation                   | 16c | Who will generate the allocation sequence, who will enrol participants, and who will assign participants to interventions                                                                                                                                                                                                                                | ___8___       |
| 30 |                                  |     |                                                                                                                                                                                                                                                                                                                                                          |               |
| 31 |                                  |     |                                                                                                                                                                                                                                                                                                                                                          |               |
| 32 |                                  |     |                                                                                                                                                                                                                                                                                                                                                          |               |
| 33 | Blinding (masking)               | 17a | Who will be blinded after assignment to interventions (eg, trial participants, care providers, outcome assessors, data analysts), and how                                                                                                                                                                                                                | ___N/A (8)___ |
| 34 |                                  |     |                                                                                                                                                                                                                                                                                                                                                          |               |
| 35 |                                  |     |                                                                                                                                                                                                                                                                                                                                                          |               |
| 36 |                                  | 17b | If blinded, circumstances under which unblinding is permissible, and procedure for revealing a participant's allocated intervention during the trial                                                                                                                                                                                                     | ___N/A___     |
| 37 |                                  |     |                                                                                                                                                                                                                                                                                                                                                          |               |
| 38 |                                  |     |                                                                                                                                                                                                                                                                                                                                                          |               |
| 39 |                                  |     |                                                                                                                                                                                                                                                                                                                                                          |               |
| 40 |                                  |     |                                                                                                                                                                                                                                                                                                                                                          |               |
| 41 |                                  |     |                                                                                                                                                                                                                                                                                                                                                          |               |
| 42 |                                  |     |                                                                                                                                                                                                                                                                                                                                                          |               |

### Methods: Data collection, management, and analysis

|    |                            |     |                                                                                                               |
|----|----------------------------|-----|---------------------------------------------------------------------------------------------------------------|
| 1  |                            |     |                                                                                                               |
| 2  |                            |     |                                                                                                               |
| 3  |                            |     |                                                                                                               |
| 4  |                            |     |                                                                                                               |
| 5  | Data collection            | 18a | Plans for assessment and collection of outcome, baseline, and other trial data, including any related         |
| 6  | methods                    |     | processes to promote data quality (eg, duplicate measurements, training of assessors) and a description of    |
| 7  |                            |     | study instruments (eg, questionnaires, laboratory tests) along with their reliability and validity, if known. |
| 8  |                            |     | Reference to where data collection forms can be found, if not in the protocol                                 |
| 9  |                            |     |                                                                                                               |
| 10 |                            |     |                                                                                                               |
| 11 |                            | 18b | Plans to promote participant retention and complete follow-up, including list of any outcome data to be       |
| 12 |                            |     | collected for participants who discontinue or deviate from intervention protocols                             |
| 13 |                            |     |                                                                                                               |
| 14 | Data management            | 19  | Plans for data entry, coding, security, and storage, including any related processes to promote data quality  |
| 15 |                            |     | (eg, double data entry; range checks for data values). Reference to where details of data management          |
| 16 |                            |     | procedures can be found, if not in the protocol                                                               |
| 17 |                            |     |                                                                                                               |
| 18 |                            |     |                                                                                                               |
| 19 | Statistical methods        | 20a | Statistical methods for analysing primary and secondary outcomes. Reference to where other details of the     |
| 20 |                            |     | statistical analysis plan can be found, if not in the protocol                                                |
| 21 |                            |     |                                                                                                               |
| 22 |                            | 20b | Methods for any additional analyses (eg, subgroup and adjusted analyses)                                      |
| 23 |                            |     |                                                                                                               |
| 24 |                            | 20c | Definition of analysis population relating to protocol non-adherence (eg, as randomised analysis), and any    |
| 25 |                            |     | statistical methods to handle missing data (eg, multiple imputation)                                          |
| 26 |                            |     |                                                                                                               |
| 27 |                            |     |                                                                                                               |
| 28 | <b>Methods: Monitoring</b> |     |                                                                                                               |
| 29 |                            |     |                                                                                                               |
| 30 | Data monitoring            | 21a | Composition of data monitoring committee (DMC); summary of its role and reporting structure; statement of     |
| 31 |                            |     | whether it is independent from the sponsor and competing interests; and reference to where further details    |
| 32 |                            |     | about its charter can be found, if not in the protocol. Alternatively, an explanation of why a DMC is not     |
| 33 |                            |     | needed                                                                                                        |
| 34 |                            |     |                                                                                                               |
| 35 |                            | 21b | Description of any interim analyses and stopping guidelines, including who will have access to these interim  |
| 36 |                            |     | results and make the final decision to terminate the trial                                                    |
| 37 |                            |     |                                                                                                               |
| 38 |                            |     |                                                                                                               |
| 39 | Harms                      | 22  | Plans for collecting, assessing, reporting, and managing solicited and spontaneously reported adverse         |
| 40 |                            |     | events and other unintended effects of trial interventions or trial conduct                                   |
| 41 |                            |     |                                                                                                               |
| 42 |                            |     |                                                                                                               |
| 43 |                            |     |                                                                                                               |
| 44 |                            |     |                                                                                                               |
| 45 |                            |     |                                                                                                               |
| 46 |                            |     |                                                                                                               |

|    |                                 |     |                                                                                                                                                                                                                                                                                     |             |
|----|---------------------------------|-----|-------------------------------------------------------------------------------------------------------------------------------------------------------------------------------------------------------------------------------------------------------------------------------------|-------------|
| 1  | Auditing                        | 23  | Frequency and procedures for auditing trial conduct, if any, and whether the process will be independent from investigators and the sponsor                                                                                                                                         | ___ N/A ___ |
| 2  |                                 |     |                                                                                                                                                                                                                                                                                     |             |
| 3  |                                 |     |                                                                                                                                                                                                                                                                                     |             |
| 4  | <b>Ethics and dissemination</b> |     |                                                                                                                                                                                                                                                                                     |             |
| 5  |                                 |     |                                                                                                                                                                                                                                                                                     |             |
| 6  | Research ethics approval        | 24  | Plans for seeking research ethics committee/institutional review board (REC/IRB) approval                                                                                                                                                                                           | ___ 17 ___  |
| 7  |                                 |     |                                                                                                                                                                                                                                                                                     |             |
| 8  |                                 |     |                                                                                                                                                                                                                                                                                     |             |
| 9  | Protocol amendments             | 25  | Plans for communicating important protocol modifications (eg, changes to eligibility criteria, outcomes, analyses) to relevant parties (eg, investigators, REC/IRBs, trial participants, trial registries, journals, regulators)                                                    | ___ 17 ___  |
| 10 |                                 |     |                                                                                                                                                                                                                                                                                     |             |
| 11 |                                 |     |                                                                                                                                                                                                                                                                                     |             |
| 12 |                                 |     |                                                                                                                                                                                                                                                                                     |             |
| 13 |                                 |     |                                                                                                                                                                                                                                                                                     |             |
| 14 | Consent or assent               | 26a | Who will obtain informed consent or assent from potential trial participants or authorised surrogates, and how (see Item 32)                                                                                                                                                        | ___ 17 ___  |
| 15 |                                 |     |                                                                                                                                                                                                                                                                                     |             |
| 16 |                                 |     |                                                                                                                                                                                                                                                                                     |             |
| 17 |                                 | 26b | Additional consent provisions for collection and use of participant data and biological specimens in ancillary studies, if applicable                                                                                                                                               | ___ N/A ___ |
| 18 |                                 |     |                                                                                                                                                                                                                                                                                     |             |
| 19 |                                 |     |                                                                                                                                                                                                                                                                                     |             |
| 20 | Confidentiality                 | 27  | How personal information about potential and enrolled participants will be collected, shared, and maintained in order to protect confidentiality before, during, and after the trial                                                                                                | ___ 17 ___  |
| 21 |                                 |     |                                                                                                                                                                                                                                                                                     |             |
| 22 |                                 |     |                                                                                                                                                                                                                                                                                     |             |
| 23 |                                 |     |                                                                                                                                                                                                                                                                                     |             |
| 24 | Declaration of interests        | 28  | Financial and other competing interests for principal investigators for the overall trial and each study site                                                                                                                                                                       | ___ 19 ___  |
| 25 |                                 |     |                                                                                                                                                                                                                                                                                     |             |
| 26 |                                 |     |                                                                                                                                                                                                                                                                                     |             |
| 27 | Access to data                  | 29  | Statement of who will have access to the final trial dataset, and disclosure of contractual agreements that limit such access for investigators                                                                                                                                     | ___ 17 ___  |
| 28 |                                 |     |                                                                                                                                                                                                                                                                                     |             |
| 29 |                                 |     |                                                                                                                                                                                                                                                                                     |             |
| 30 | Ancillary and post-trial care   | 30  | Provisions, if any, for ancillary and post-trial care, and for compensation to those who suffer harm from trial participation                                                                                                                                                       | ___ N/A ___ |
| 31 |                                 |     |                                                                                                                                                                                                                                                                                     |             |
| 32 |                                 |     |                                                                                                                                                                                                                                                                                     |             |
| 33 | Dissemination policy            | 31a | Plans for investigators and sponsor to communicate trial results to participants, healthcare professionals, the public, and other relevant groups (eg, via publication, reporting in results databases, or other data sharing arrangements), including any publication restrictions | ___ 17 ___  |
| 34 |                                 |     |                                                                                                                                                                                                                                                                                     |             |
| 35 |                                 |     |                                                                                                                                                                                                                                                                                     |             |
| 36 |                                 |     |                                                                                                                                                                                                                                                                                     |             |
| 37 |                                 |     |                                                                                                                                                                                                                                                                                     |             |
| 38 |                                 | 31b | Authorship eligibility guidelines and any intended use of professional writers                                                                                                                                                                                                      | ___ 19 ___  |
| 39 |                                 |     |                                                                                                                                                                                                                                                                                     |             |
| 40 |                                 | 31c | Plans, if any, for granting public access to the full protocol, participant-level dataset, and statistical code                                                                                                                                                                     | ___ N/A ___ |
| 41 |                                 |     |                                                                                                                                                                                                                                                                                     |             |
| 42 |                                 |     |                                                                                                                                                                                                                                                                                     |             |
| 43 |                                 |     |                                                                                                                                                                                                                                                                                     |             |
| 44 |                                 |     |                                                                                                                                                                                                                                                                                     |             |
| 45 |                                 |     |                                                                                                                                                                                                                                                                                     |             |
| 46 |                                 |     |                                                                                                                                                                                                                                                                                     |             |

1  
2  
3  
4  
5  
6  
7  
8  
9  
10  
11  
12  
13  
14  
15  
16  
17  
18  
19  
20  
21  
22  
23  
24  
25  
26  
27  
28  
29  
30  
31  
32  
33  
34  
35  
36  
37  
38  
39  
40  
41  
42  
43  
44  
45  
46

**Appendices**

|                            |    |                                                                                                                                                                                                |                           |
|----------------------------|----|------------------------------------------------------------------------------------------------------------------------------------------------------------------------------------------------|---------------------------|
| Informed consent materials | 32 | Model consent form and other related documentation given to participants and authorised surrogates                                                                                             | <u>Supplementary File</u> |
| Biological specimens       | 33 | Plans for collection, laboratory evaluation, and storage of biological specimens for genetic or molecular analysis in the current trial and for future use in ancillary studies, if applicable | <u>  N/A  </u>            |

---

\*It is strongly recommended that this checklist be read in conjunction with the SPIRIT 2013 Explanation & Elaboration for important clarification on the items. Amendments to the protocol should be tracked and dated. The SPIRIT checklist is copyrighted by the SPIRIT Group under the Creative Commons "[Attribution-NonCommercial-NoDerivs 3.0 Unported](#)" license.

peer review only
